# Supplementary material for: Menthalactone from Mentha piperita L., a Monocot-Selective Bioherbicide
Source: MDPI journal article supplement (doi:10.3390/ijpb15020025), 2024-04-11
Supplement: s1 [file s1]

## Supplementary Information

| Page Number | Figure                                   |
|-------------|------------------------------------------|
| SI1         | $^1\text{H}$ NMR spectrum of <b>1</b>    |
| SI2         | $^{13}\text{C}$ NMR spectrum of <b>1</b> |
| SI3         | Dept-135 NMR spectrum of <b>1</b>        |
| SI4         | $^1\text{H}$ NMR spectrum of <b>2</b>    |
| SI5         | $^{13}\text{C}$ NMR spectrum of <b>2</b> |
| SI6         | Dept-135 NMR spectrum of <b>2</b>        |
| SI7         | $^1\text{H}$ NMR spectrum of <b>3</b>    |
| SI9         | $^{13}\text{C}$ NMR spectrum of <b>3</b> |
| SI10        | Dept-135 NMR spectrum of <b>3</b>        |
| SI11        | $^1\text{H}$ NMR spectrum of <b>4</b>    |
| SI12        | $^{13}\text{C}$ NMR spectrum of <b>4</b> |
| SI13        | Dept-135 NMR spectrum of <b>4</b>        |
| SI14        | $^1\text{H}$ NMR spectrum of <b>5</b>    |
| SI15        | $^{13}\text{C}$ NMR spectrum of <b>5</b> |
| SI16        | Dept-135 NMR spectrum of <b>5</b>        |

| Page Number | Figure                                    |
|-------------|-------------------------------------------|
| SI17        | <sup>1</sup> H NMR spectrum of <b>6</b>   |
| SI18        | <sup>13</sup> C NMR spectrum of <b>6</b>  |
| SI19        | Dept-135 NMR spectrum of <b>6</b>         |
| SI20        | <sup>1</sup> H NMR spectrum of <b>7</b>   |
| SI21        | <sup>13</sup> C NMR spectrum of <b>7</b>  |
| SI22        | Dept-135 NMR spectrum of <b>7</b>         |
| SI23        | <sup>1</sup> H NMR spectrum of <b>8</b>   |
| SI24        | <sup>13</sup> C NMR spectrum of <b>8</b>  |
| SI25        | Dept-135 NMR spectrum of <b>8</b>         |
| SI26        | <sup>1</sup> H NMR spectrum of <b>9</b>   |
| SI27        | <sup>13</sup> C NMR spectrum of <b>9</b>  |
| SI28        | Dept-135 NMR spectrum of <b>9</b>         |
| SI29        | <sup>1</sup> H NMR spectrum of <b>10</b>  |
| SI30        | <sup>13</sup> C NMR spectrum of <b>10</b> |
| SI31        | Dept-135 NMR spectrum of <b>10</b>        |
| SI32        | <sup>1</sup> H NMR spectrum of <b>11</b>  |
| SI33        | <sup>13</sup> C NMR spectrum of <b>11</b> |
| SI34        | Dept-135 NMR spectrum of <b>11</b>        |

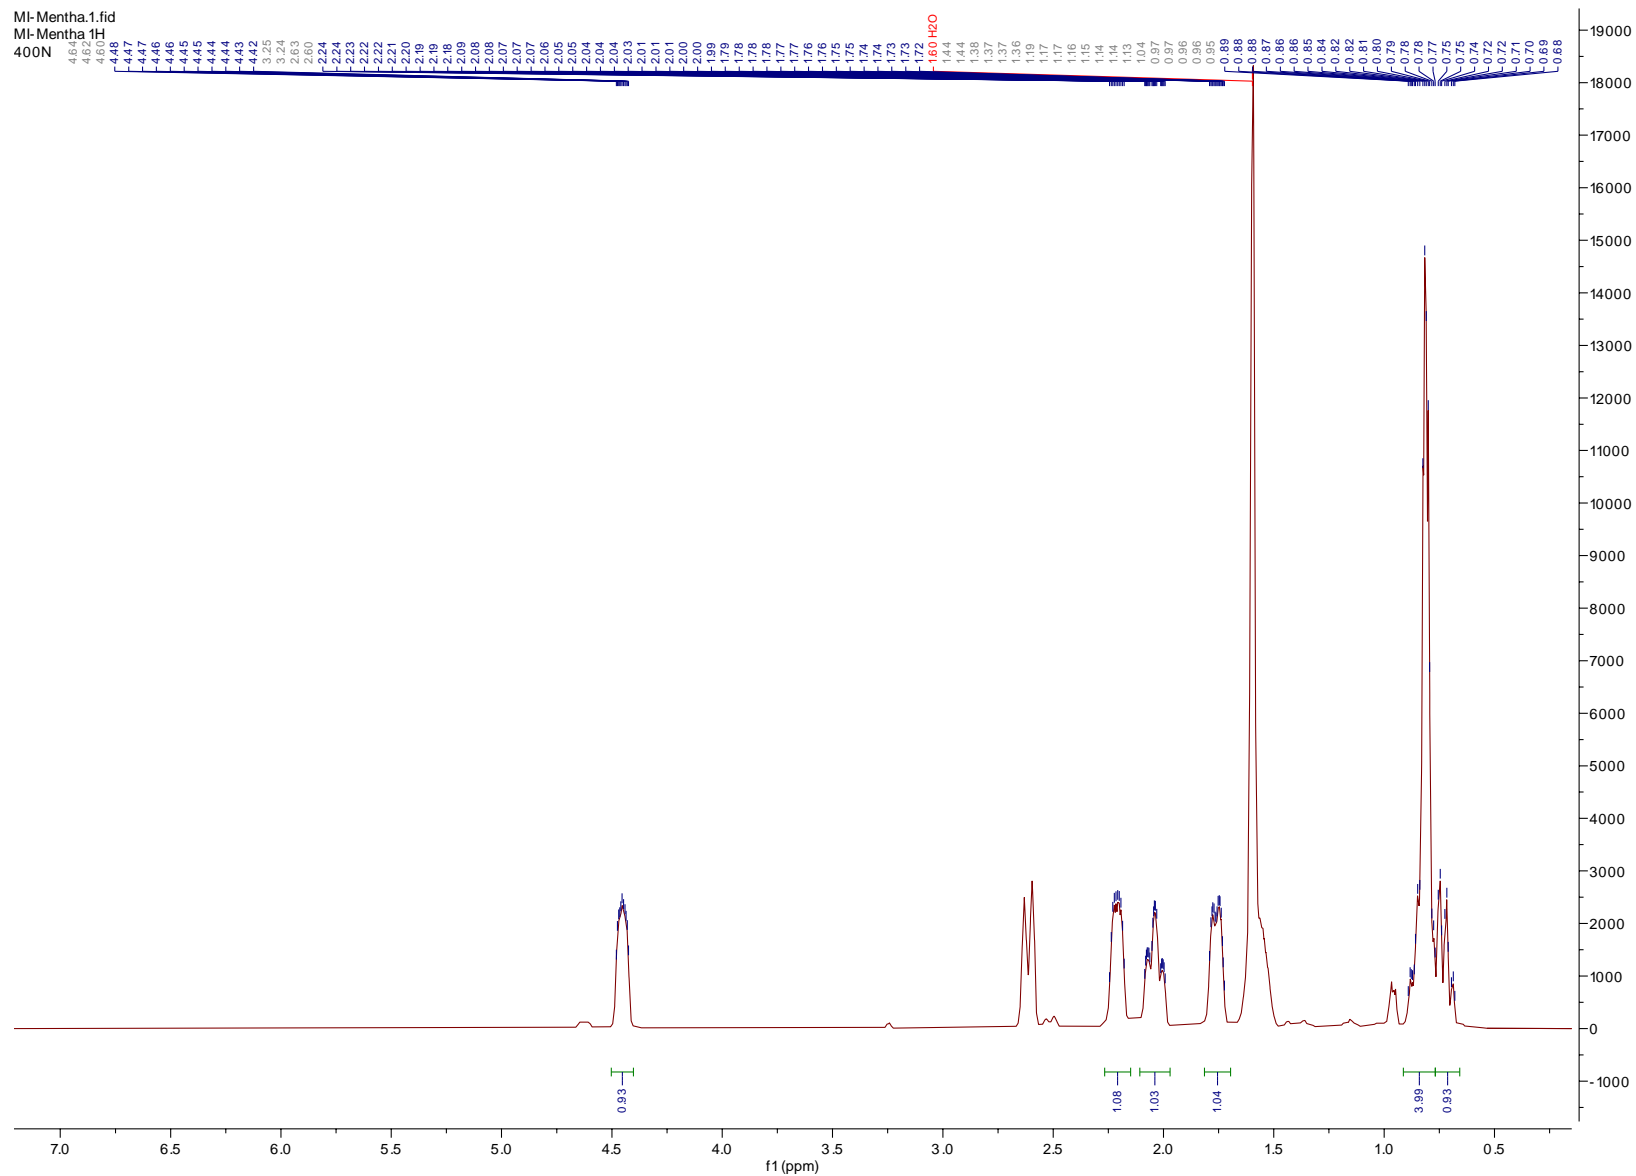

**SI 1:**  $^1\text{H}$  NMR spectrum of **1** [400 MHz,  $\text{CDCl}_3$ ]

MI-Mentha.3.fid  
MI-Mentha 13C  
400N

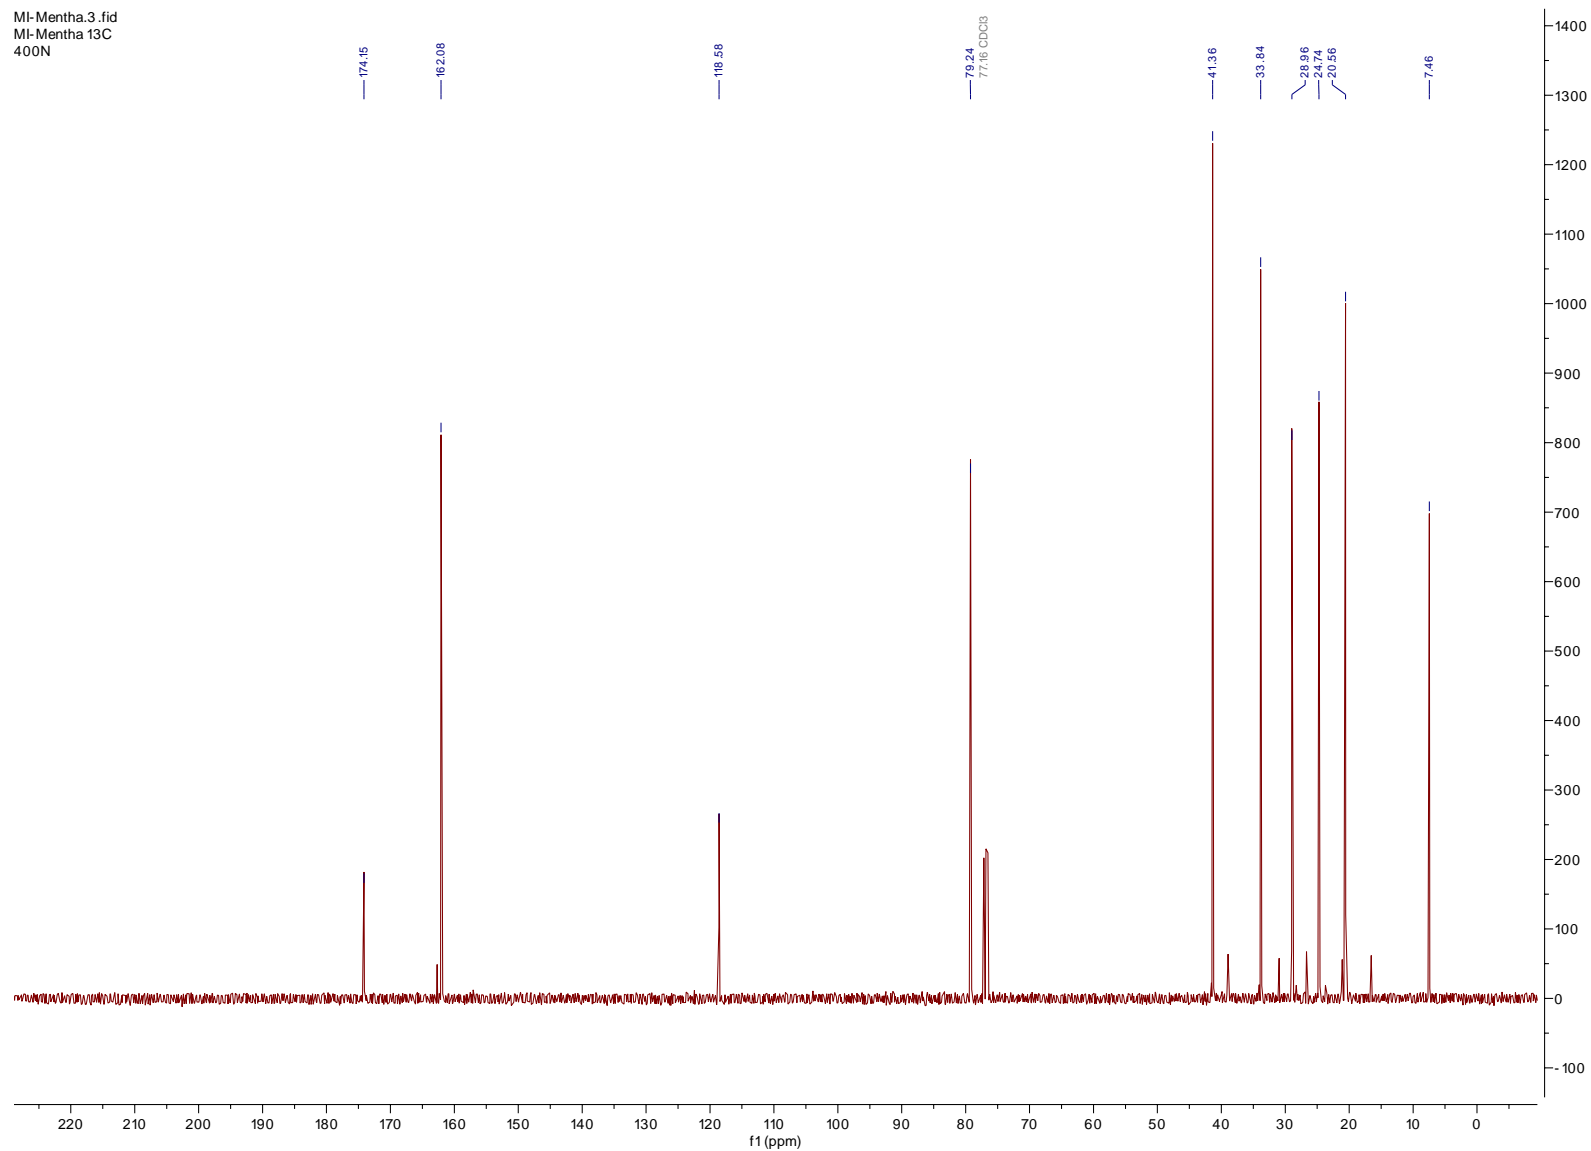

**SI 2:** <sup>13</sup>C NMR spectrum of **1** [100 MHz, CDCl<sub>3</sub>]

MI-Mentha.2.fid  
MI-Mentha Dept135  
400N

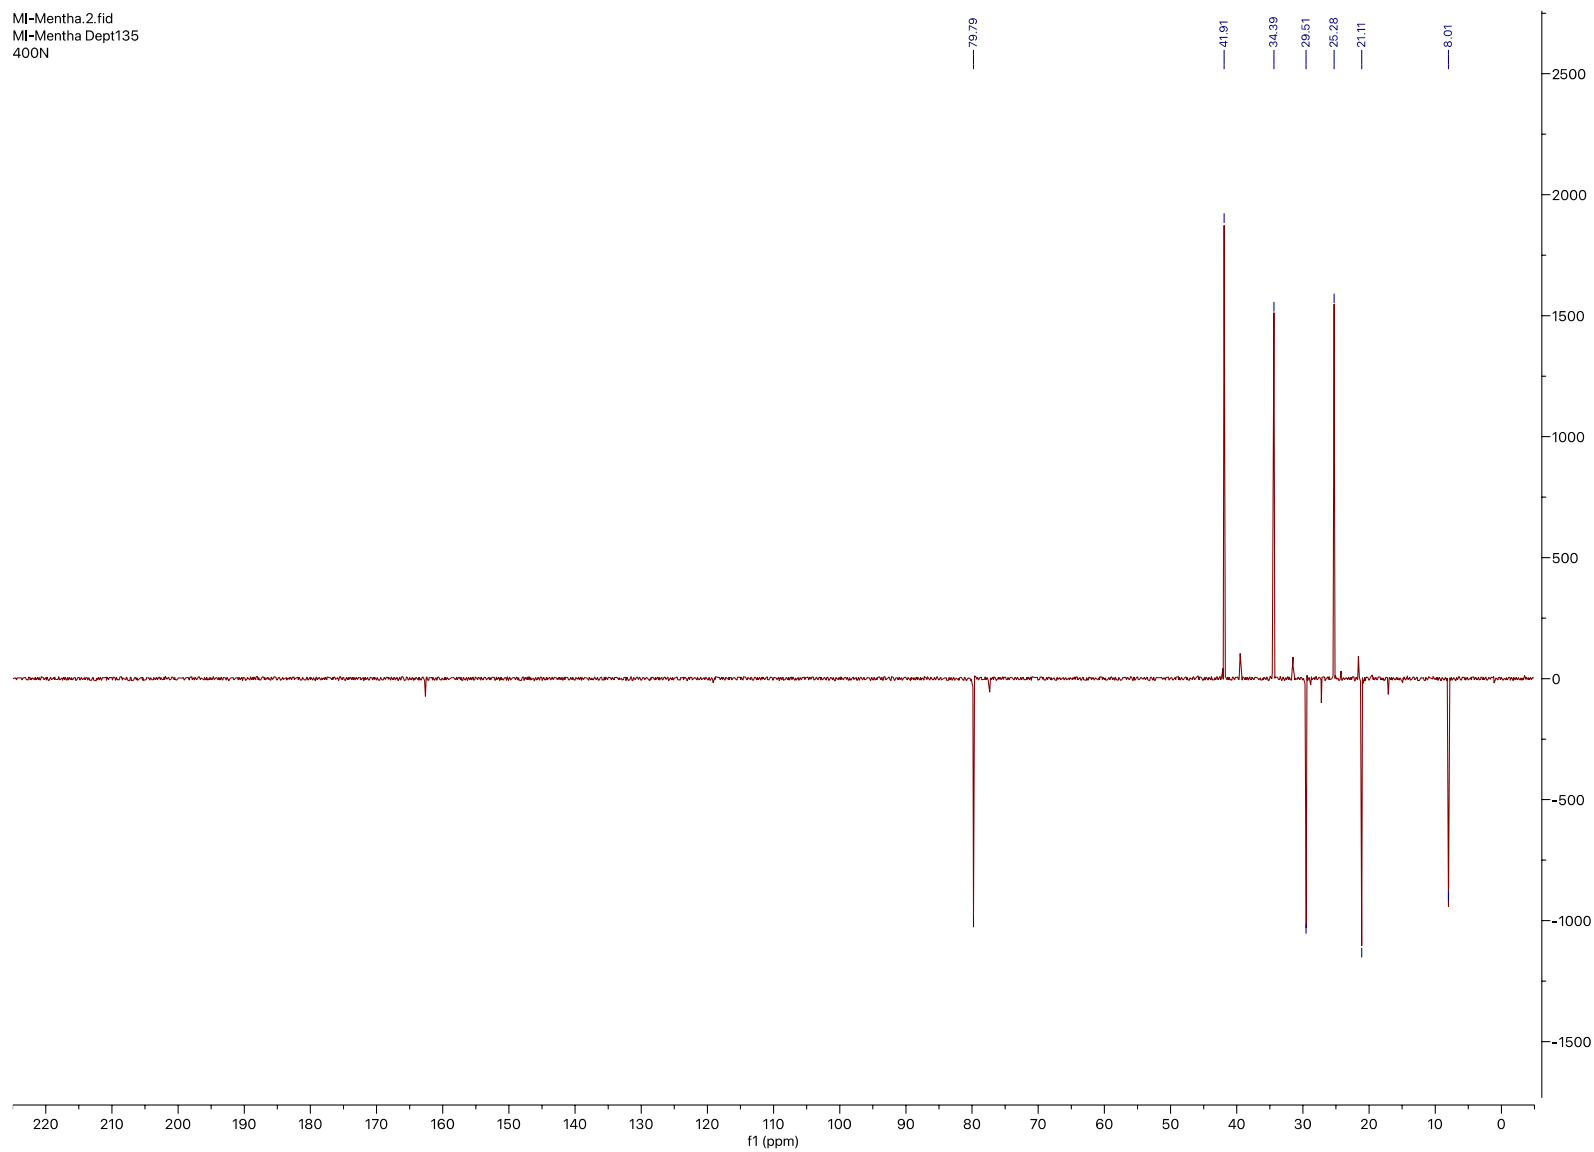

**SI 3:** Dept-135 NMR spectrum of **1** [400 MHz,  $\text{CDCl}_3$ ]

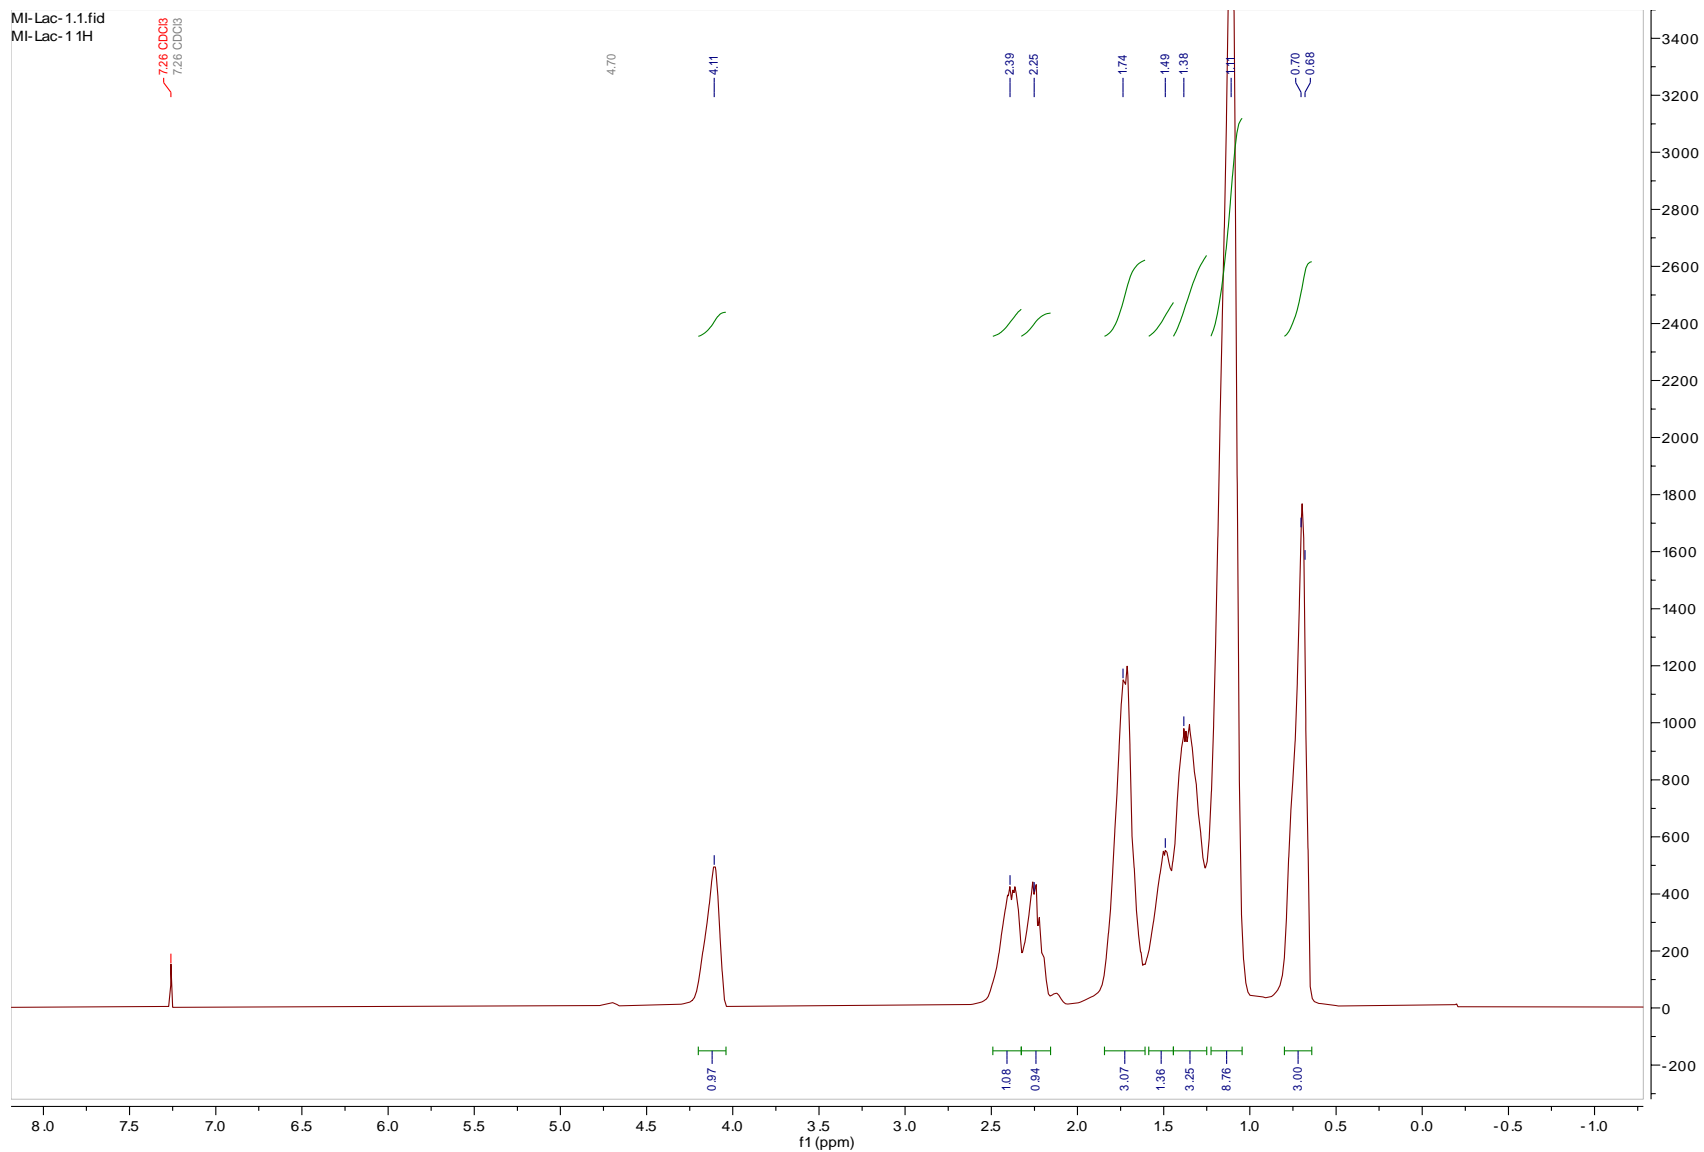

**SI 4:**  $^1\text{H}$  NMR spectrum of **2** [400 MHz,  $\text{CDCl}_3$ ]

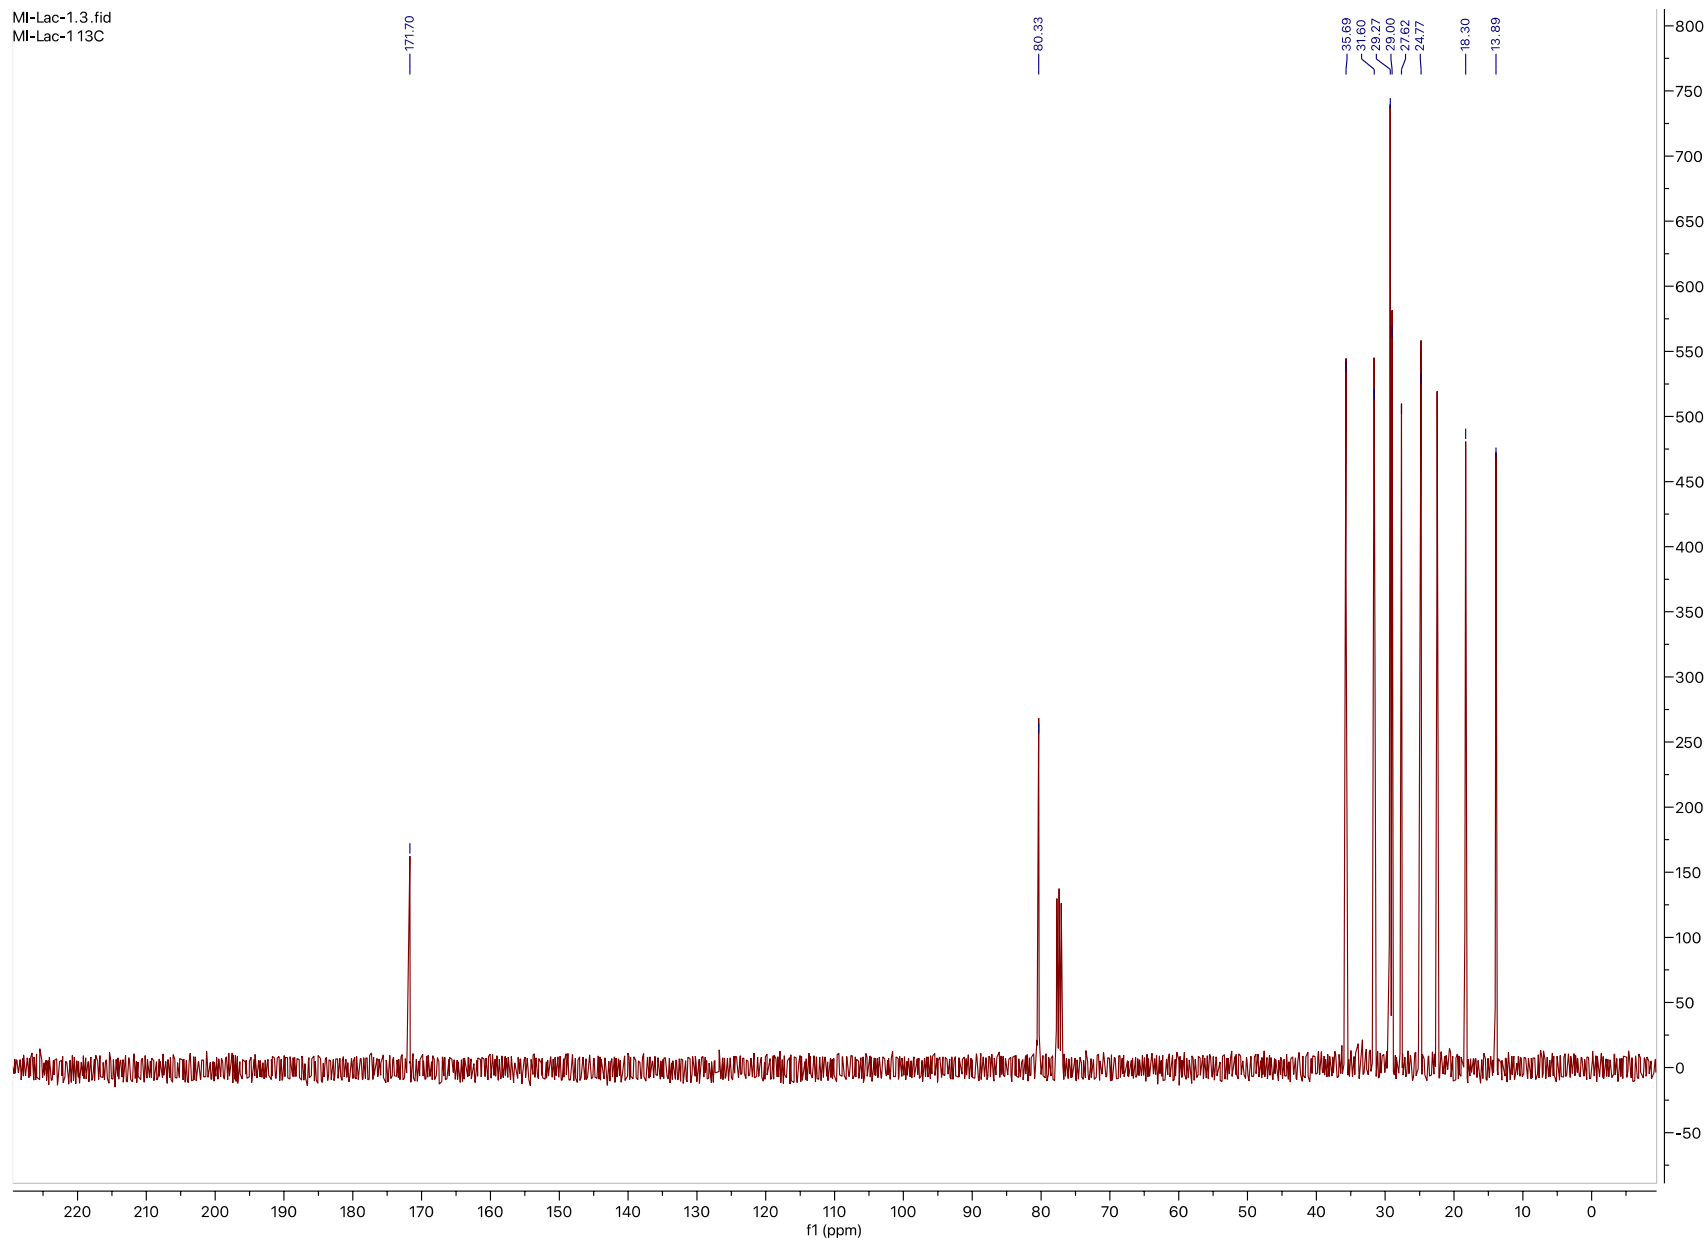

**SI 5:**  $^{13}\text{C}$  NMR spectrum of **2** [100 MHz,  $\text{CDCl}_3$ ]

MI-Lac-1.2.fid  
MI-Lac-1 Dept135

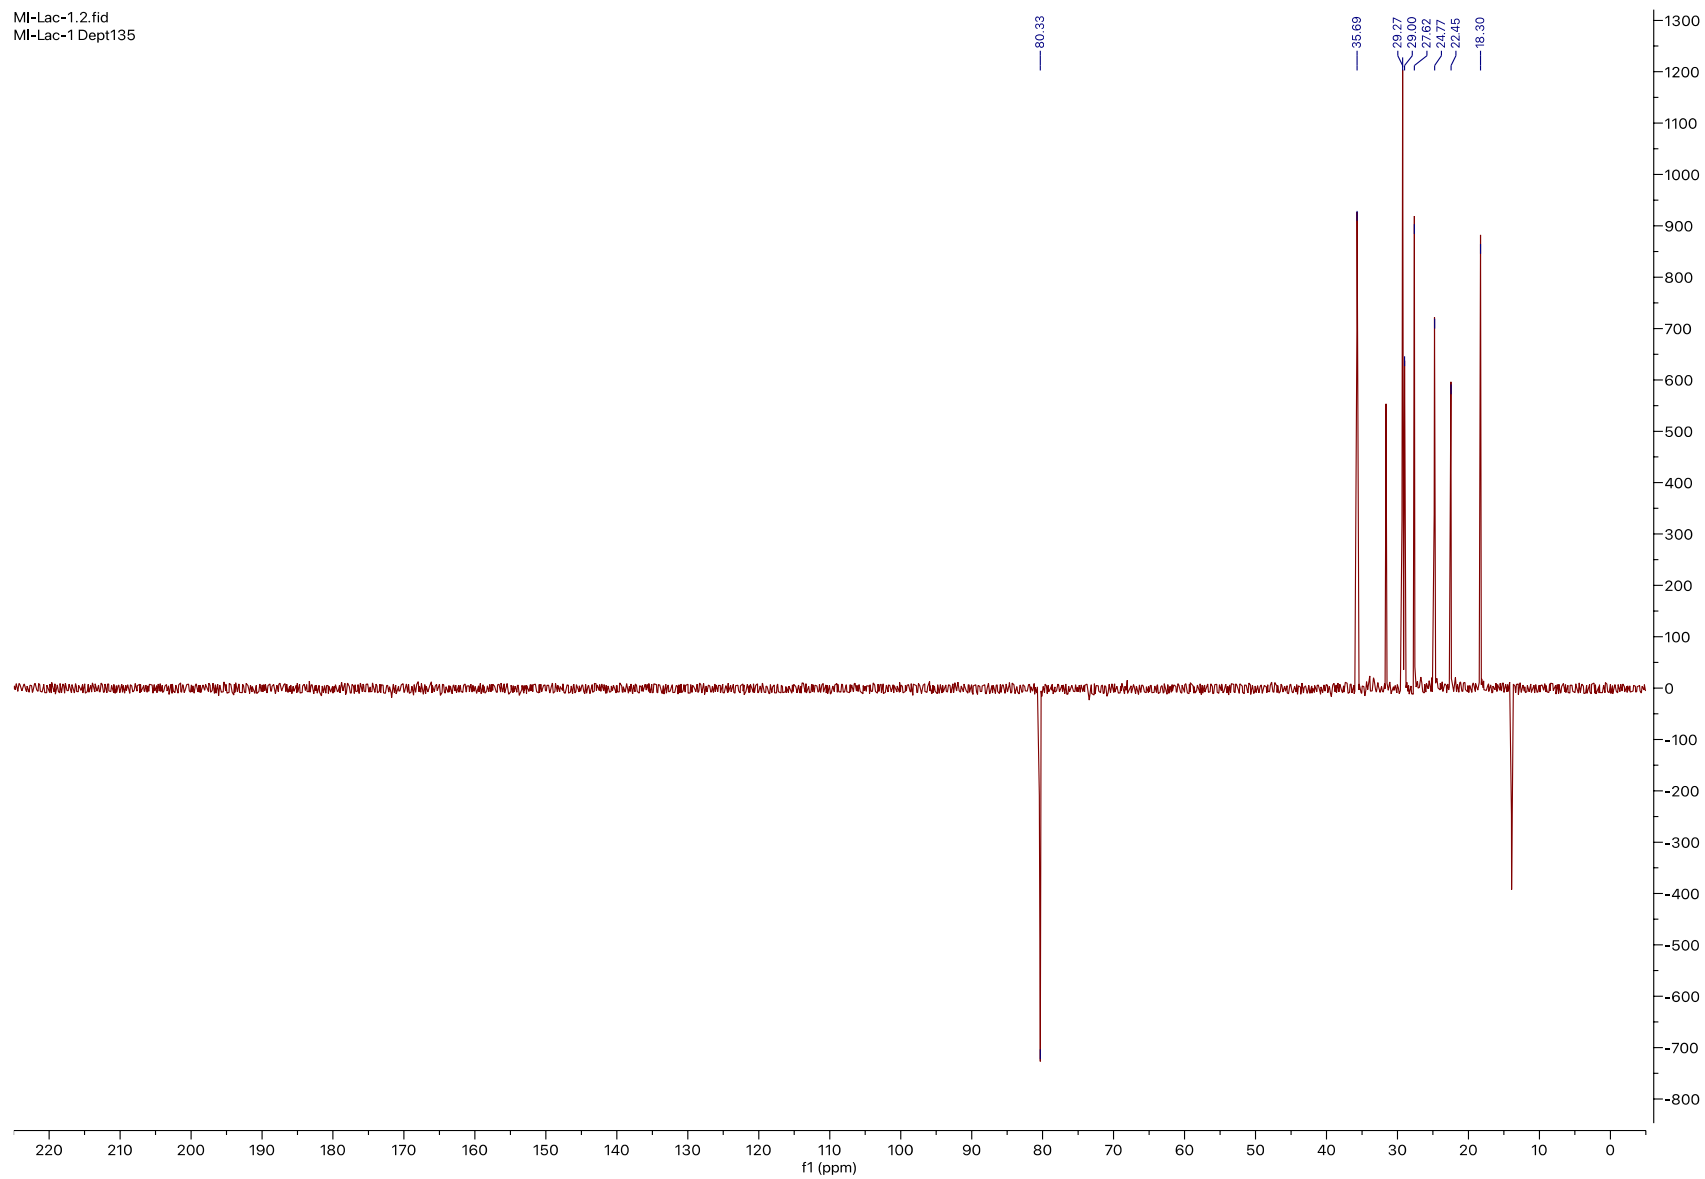

**SI 6:** Dept-135 NMR spectrum of **2** [400 MHz,  $\text{CDCl}_3$ ]



MI-Lac-2;1.fid  
MI-Lac-2;1H

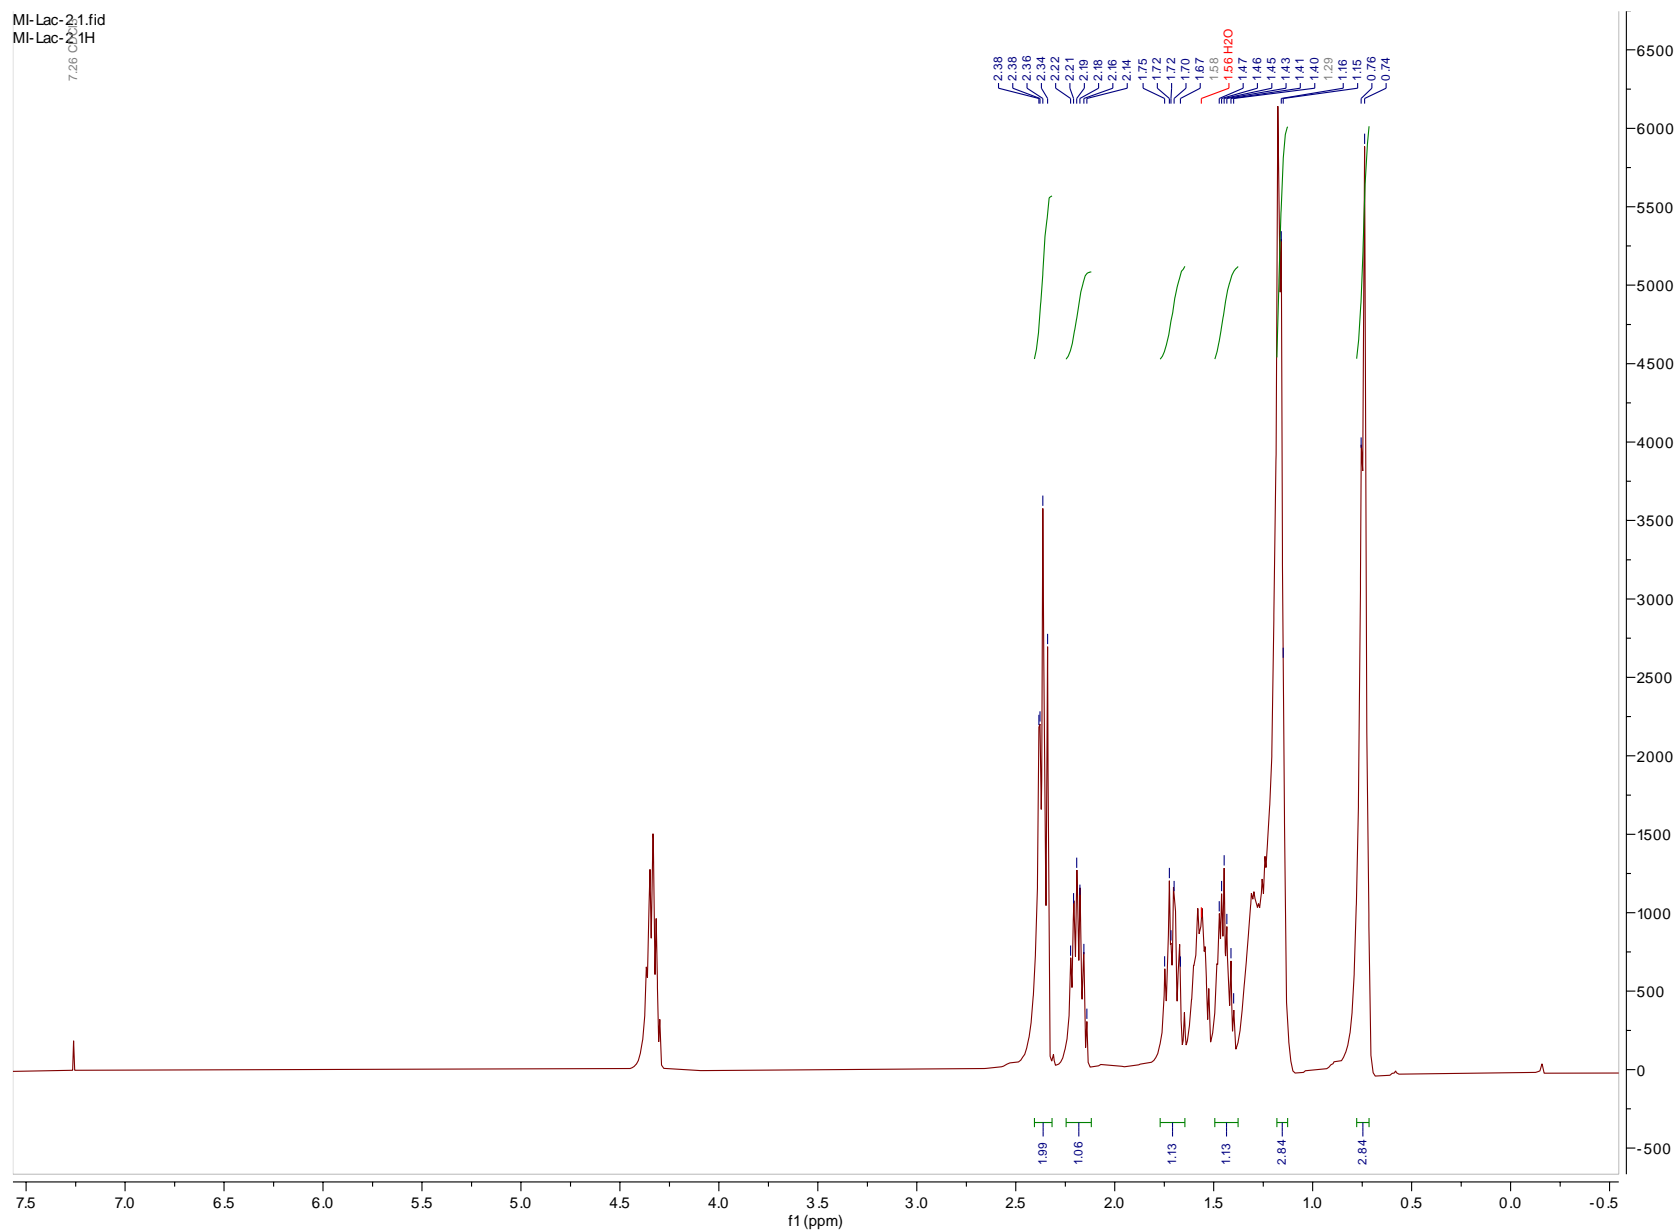

**SI 8:**  $^1\text{H}$  NMR spectrum of **3** [400 MHz,  $\text{CDCl}_3$ ]

MI-Lac-2.3.fid  
MI-Lac-2 13C

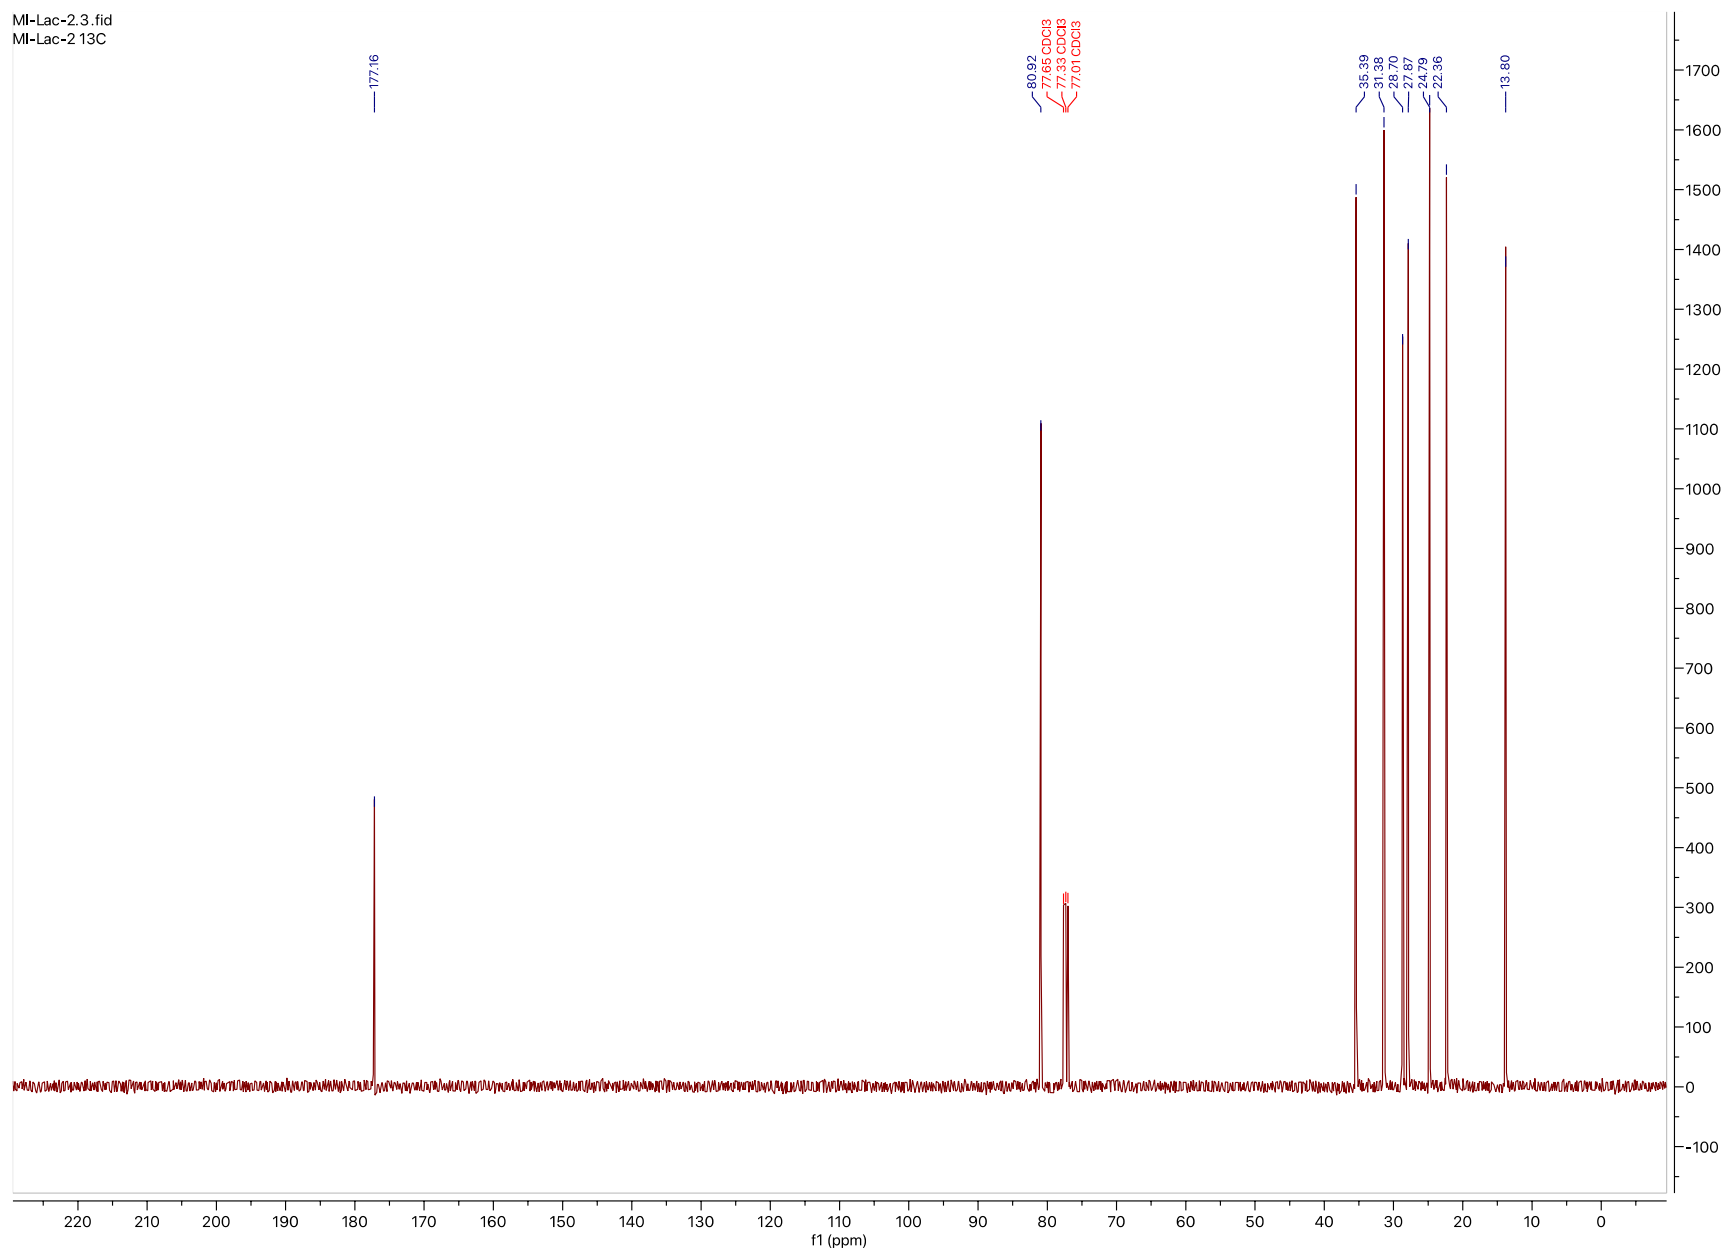

**SI 9:** <sup>13</sup>C NMR spectrum of **3** [100 MHz, CDCl<sub>3</sub>]

MI-Lac-2.2.fid  
MI-Lac-2 Dept135

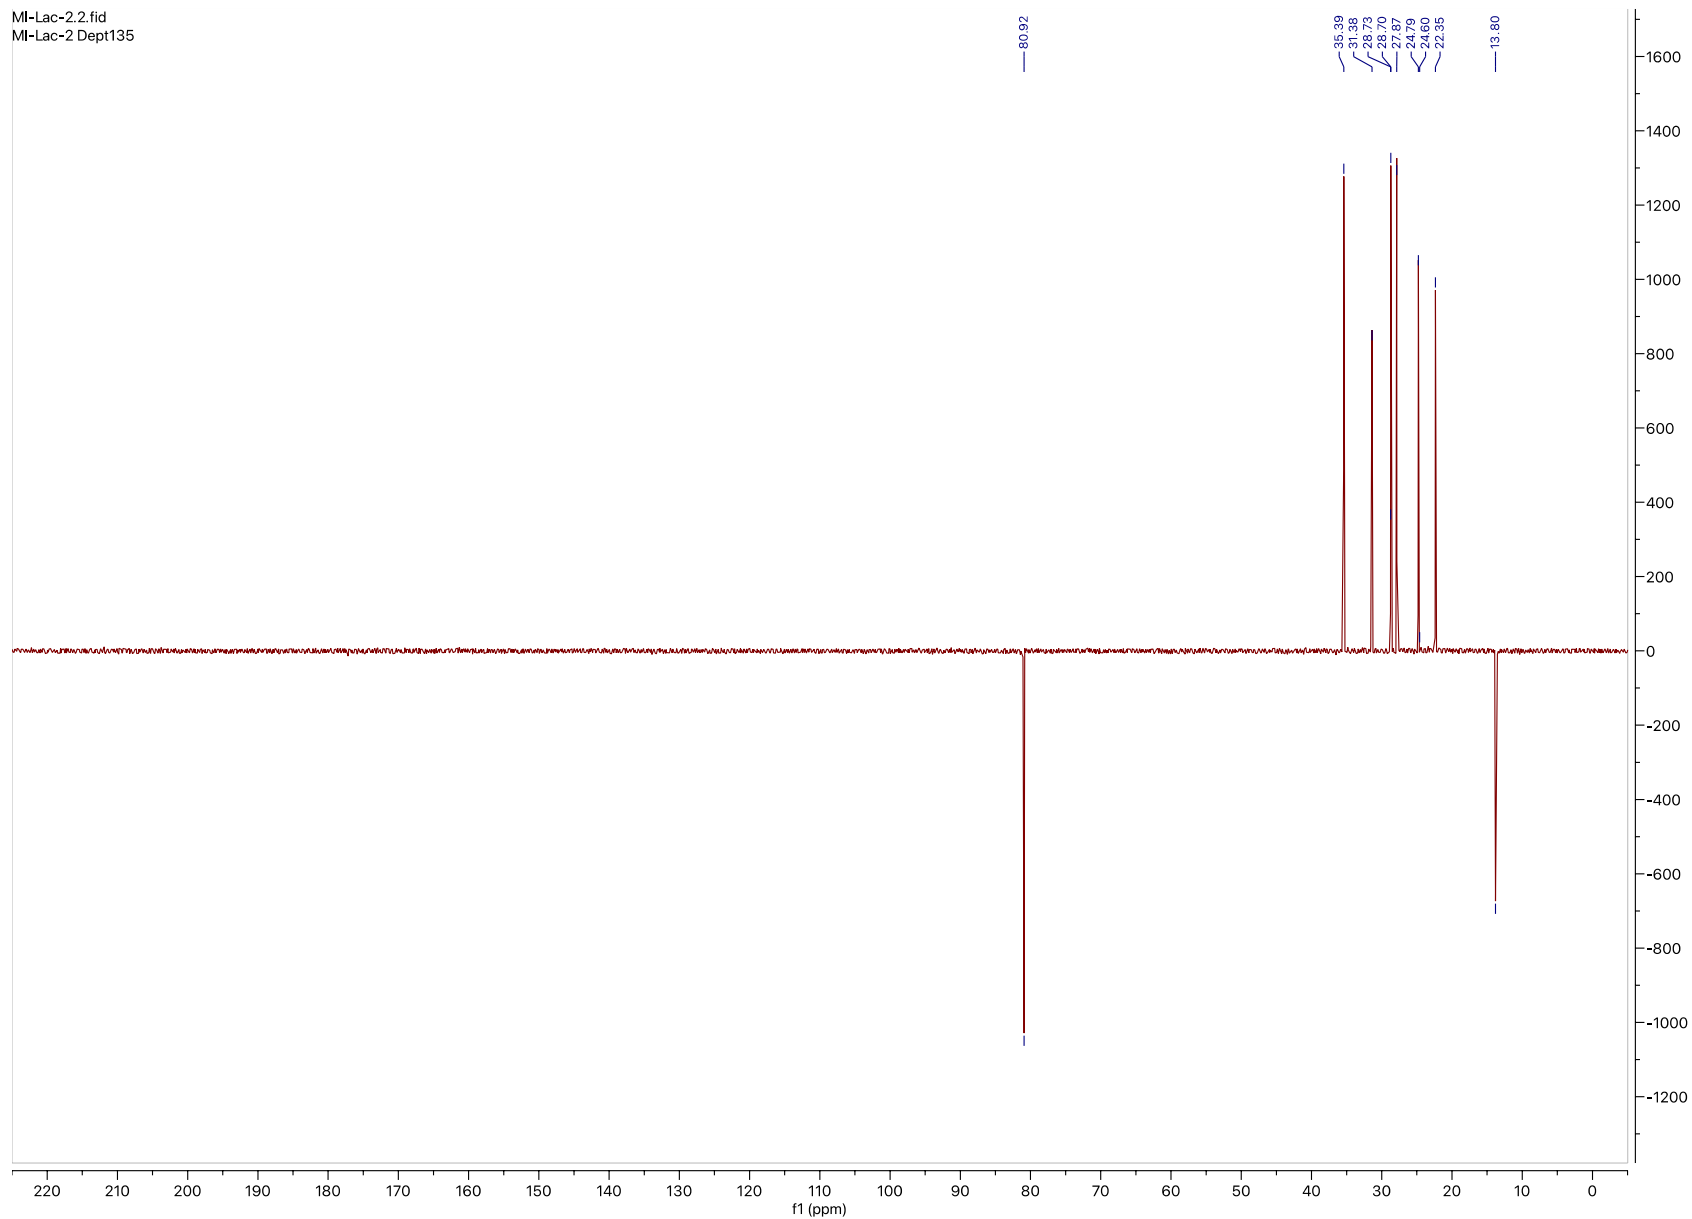

**SI 10:** Dept-135 NMR spectrum of **3** [400 MHz,  $\text{CDCl}_3$ ]

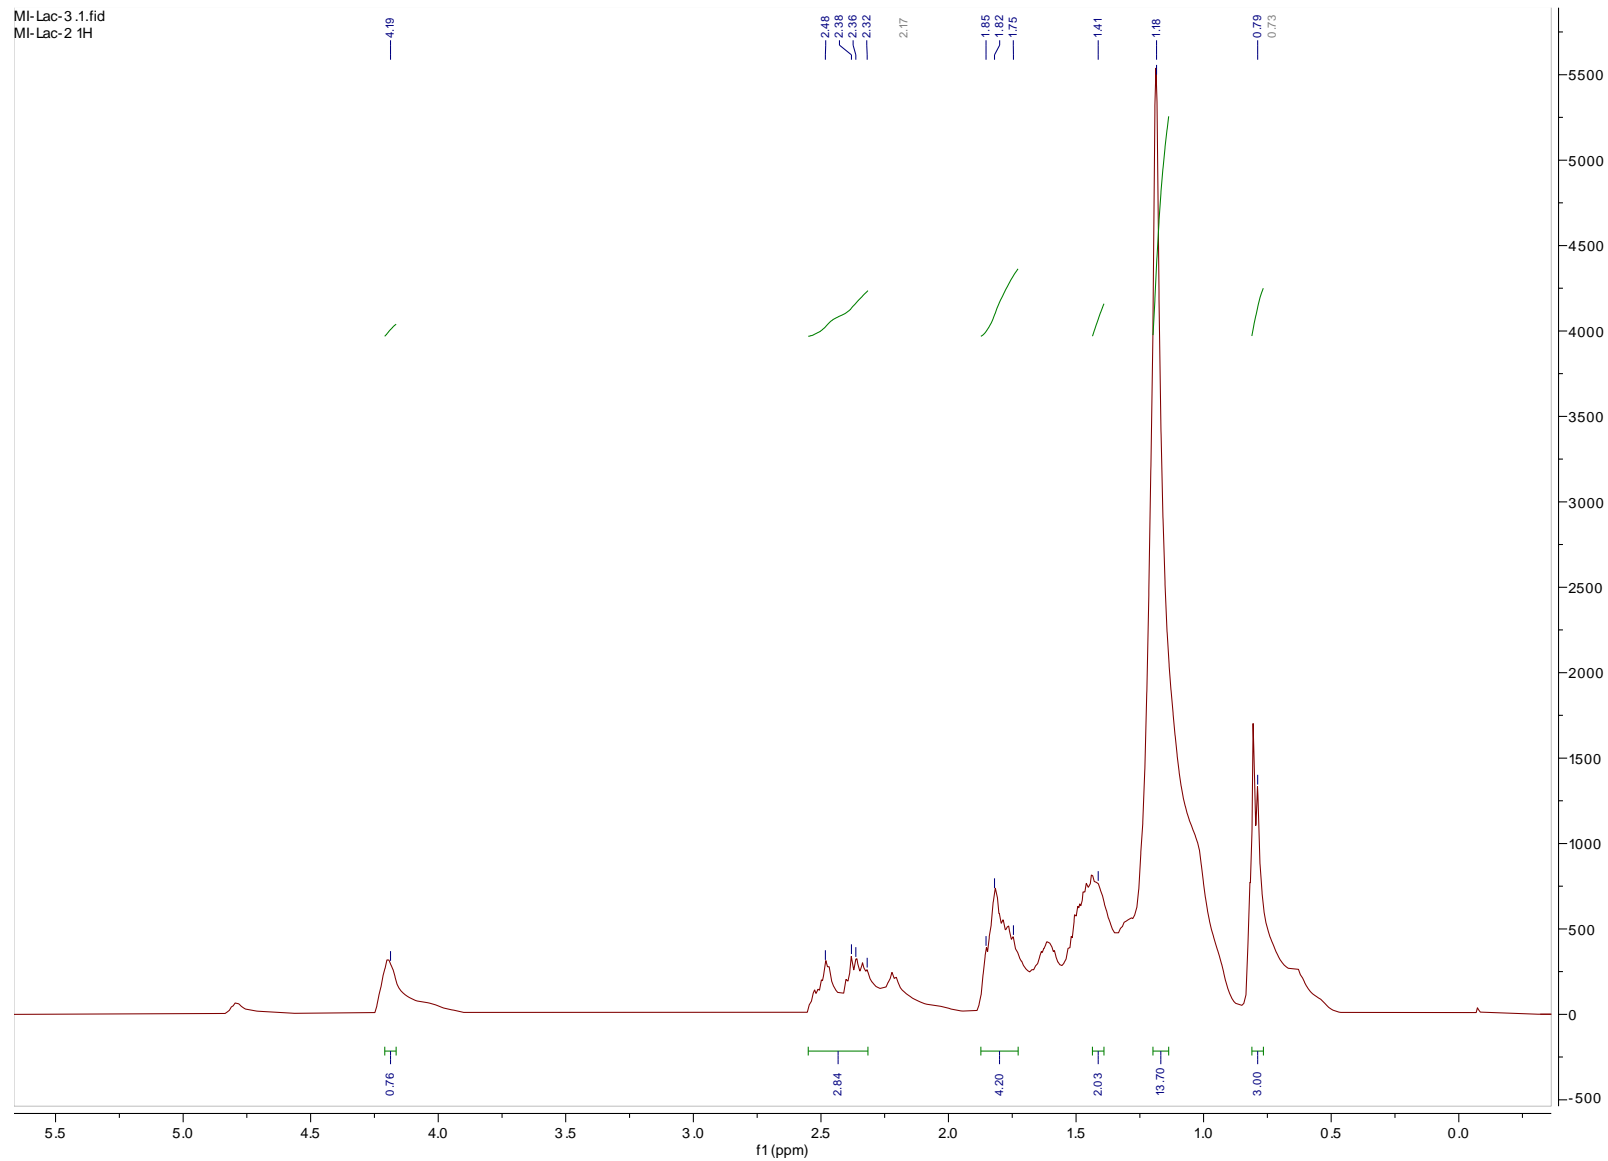

**SI 12:**  $^1\text{H}$  NMR spectrum of **4** [400 MHz,  $\text{CDCl}_3$ ]

MI-Lac-3\_3.fid  
MI-Lac-3 13C

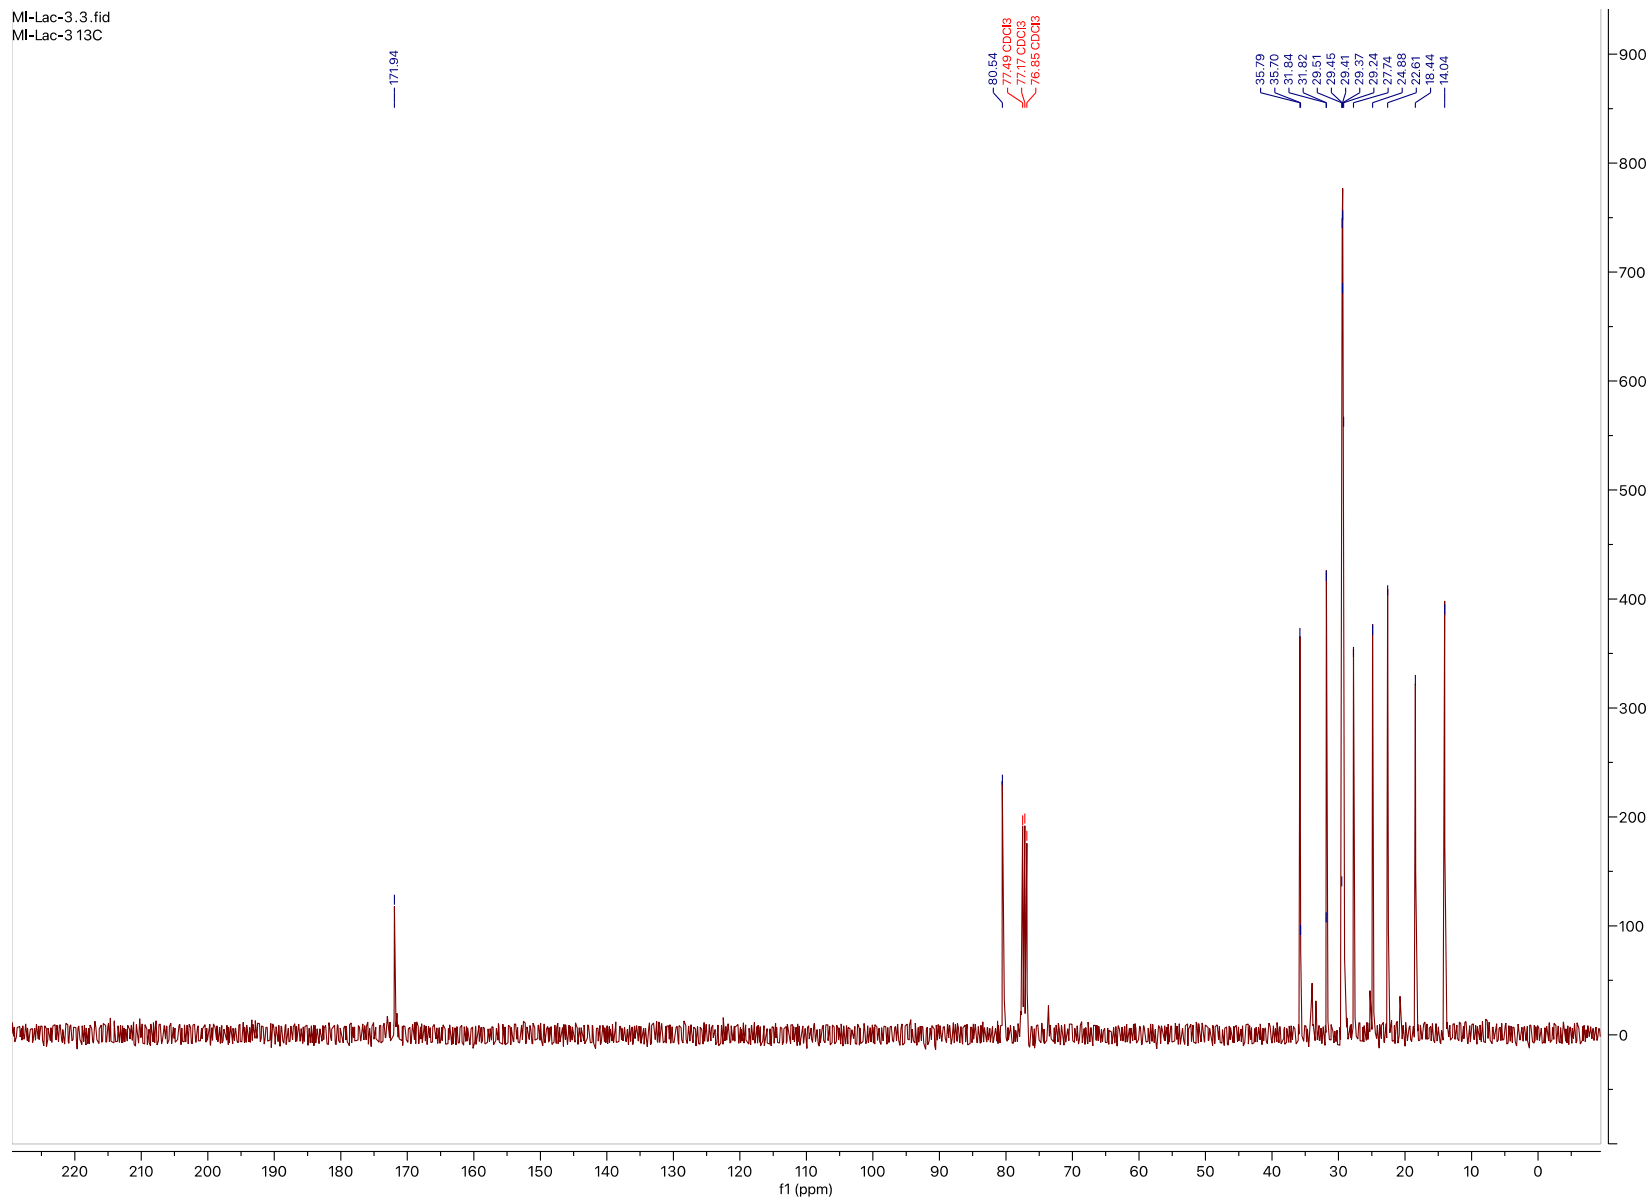

SI 13: <sup>13</sup>C NMR spectrum of **4** [100 MHz, CDCl<sub>3</sub>]

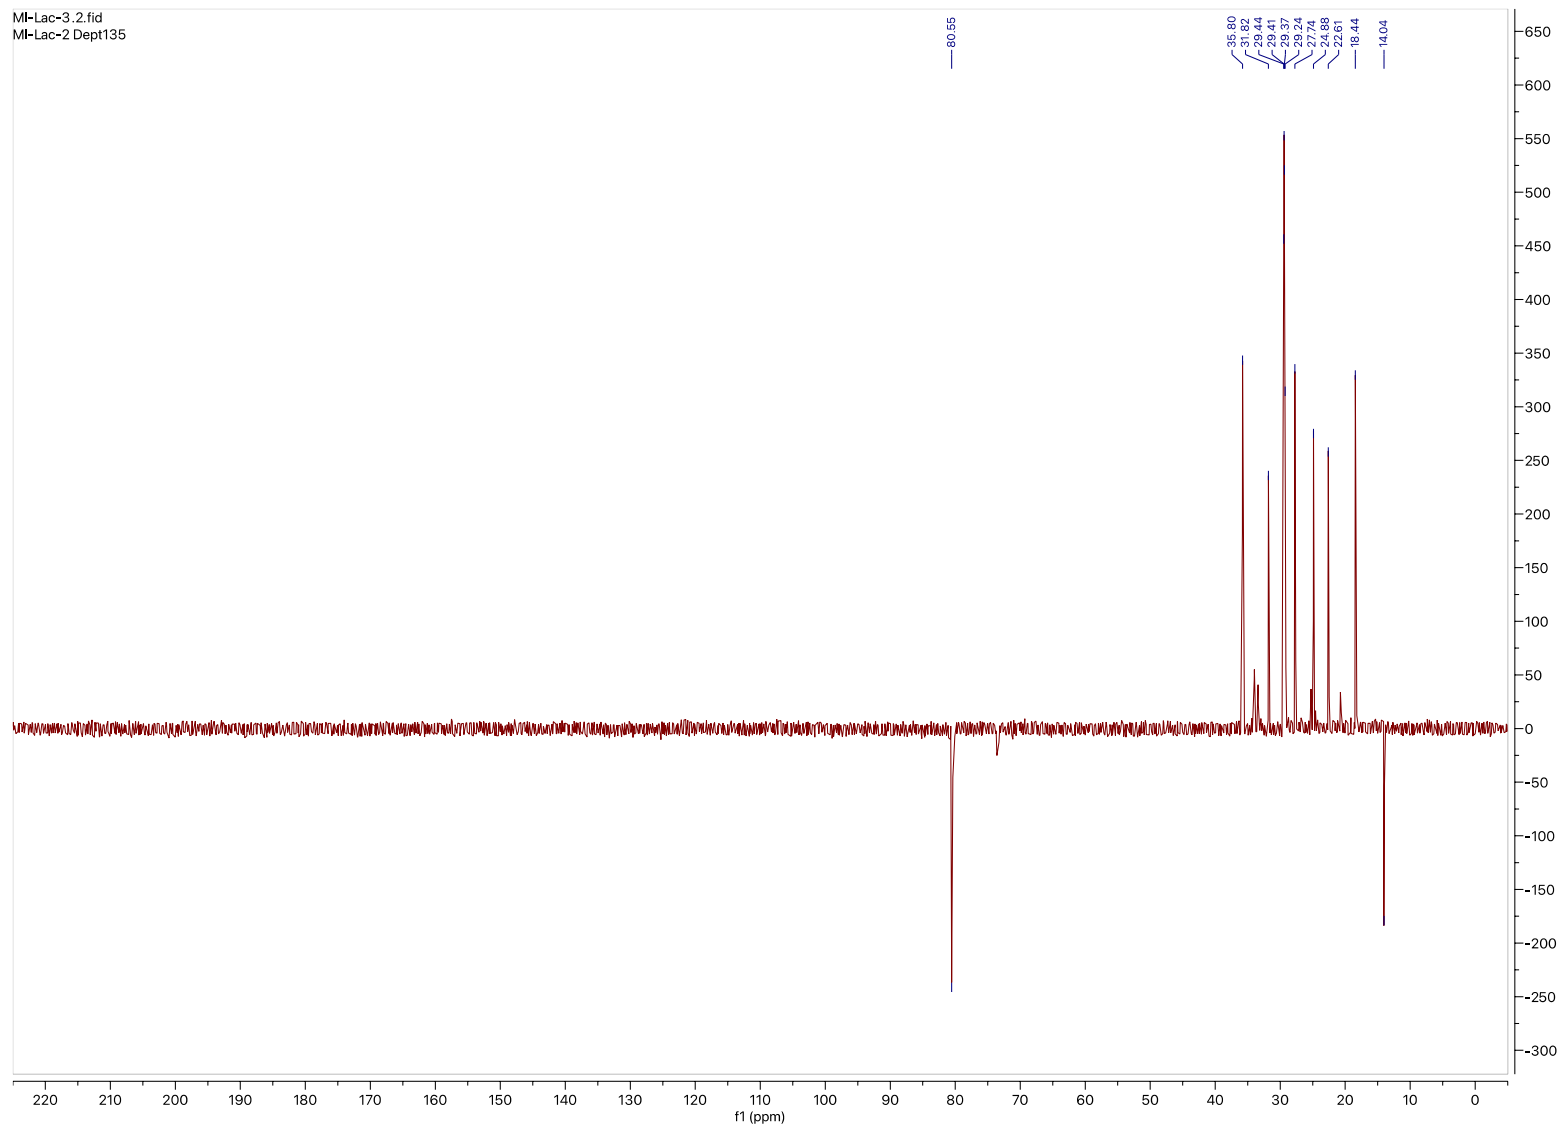

**SI 14:** Dept-135 NMR spectrum of **4** [400 MHz,  $\text{CDCl}_3$ ]

MI-Lac-4.1.fid  
MI-Lac-4 1H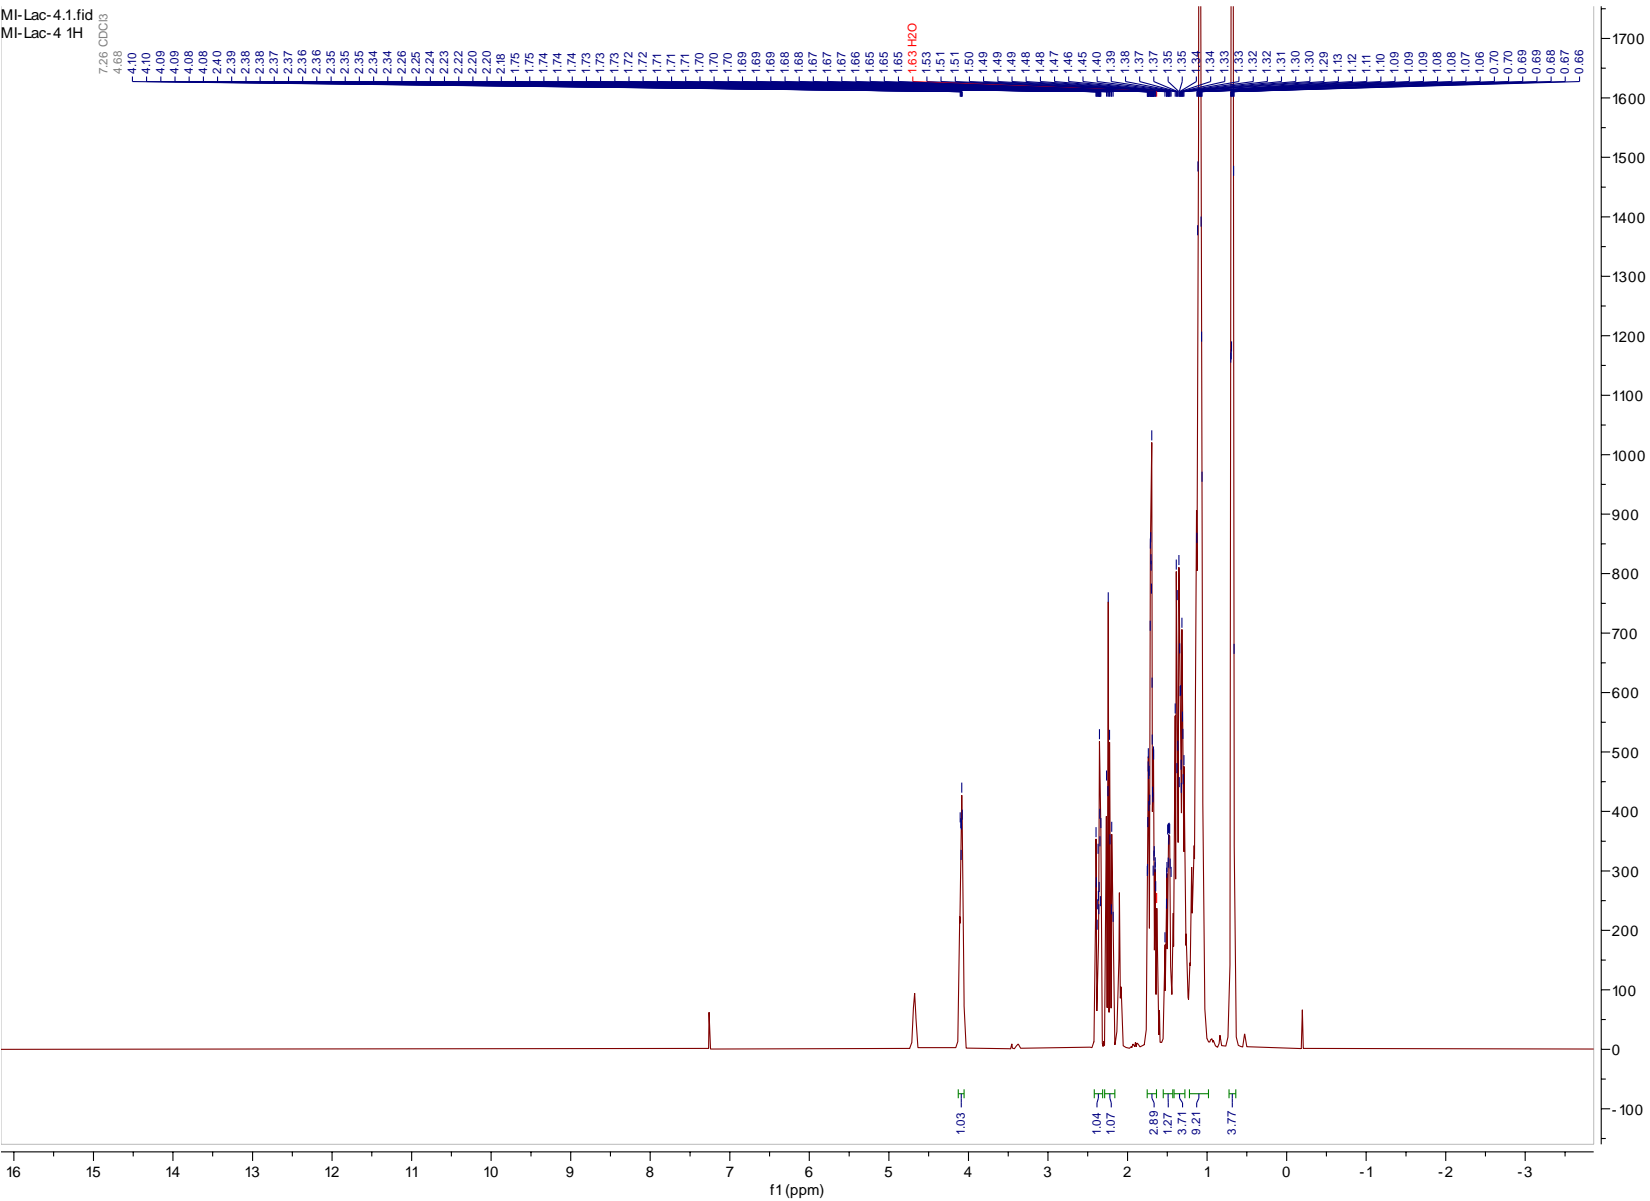

**SI 16:**  $^1\text{H}$  NMR spectrum of **5** [400 MHz,  $\text{CDCl}_3$ ]

MI-Lac-4.3.fid  
MI-Lac-4 13C

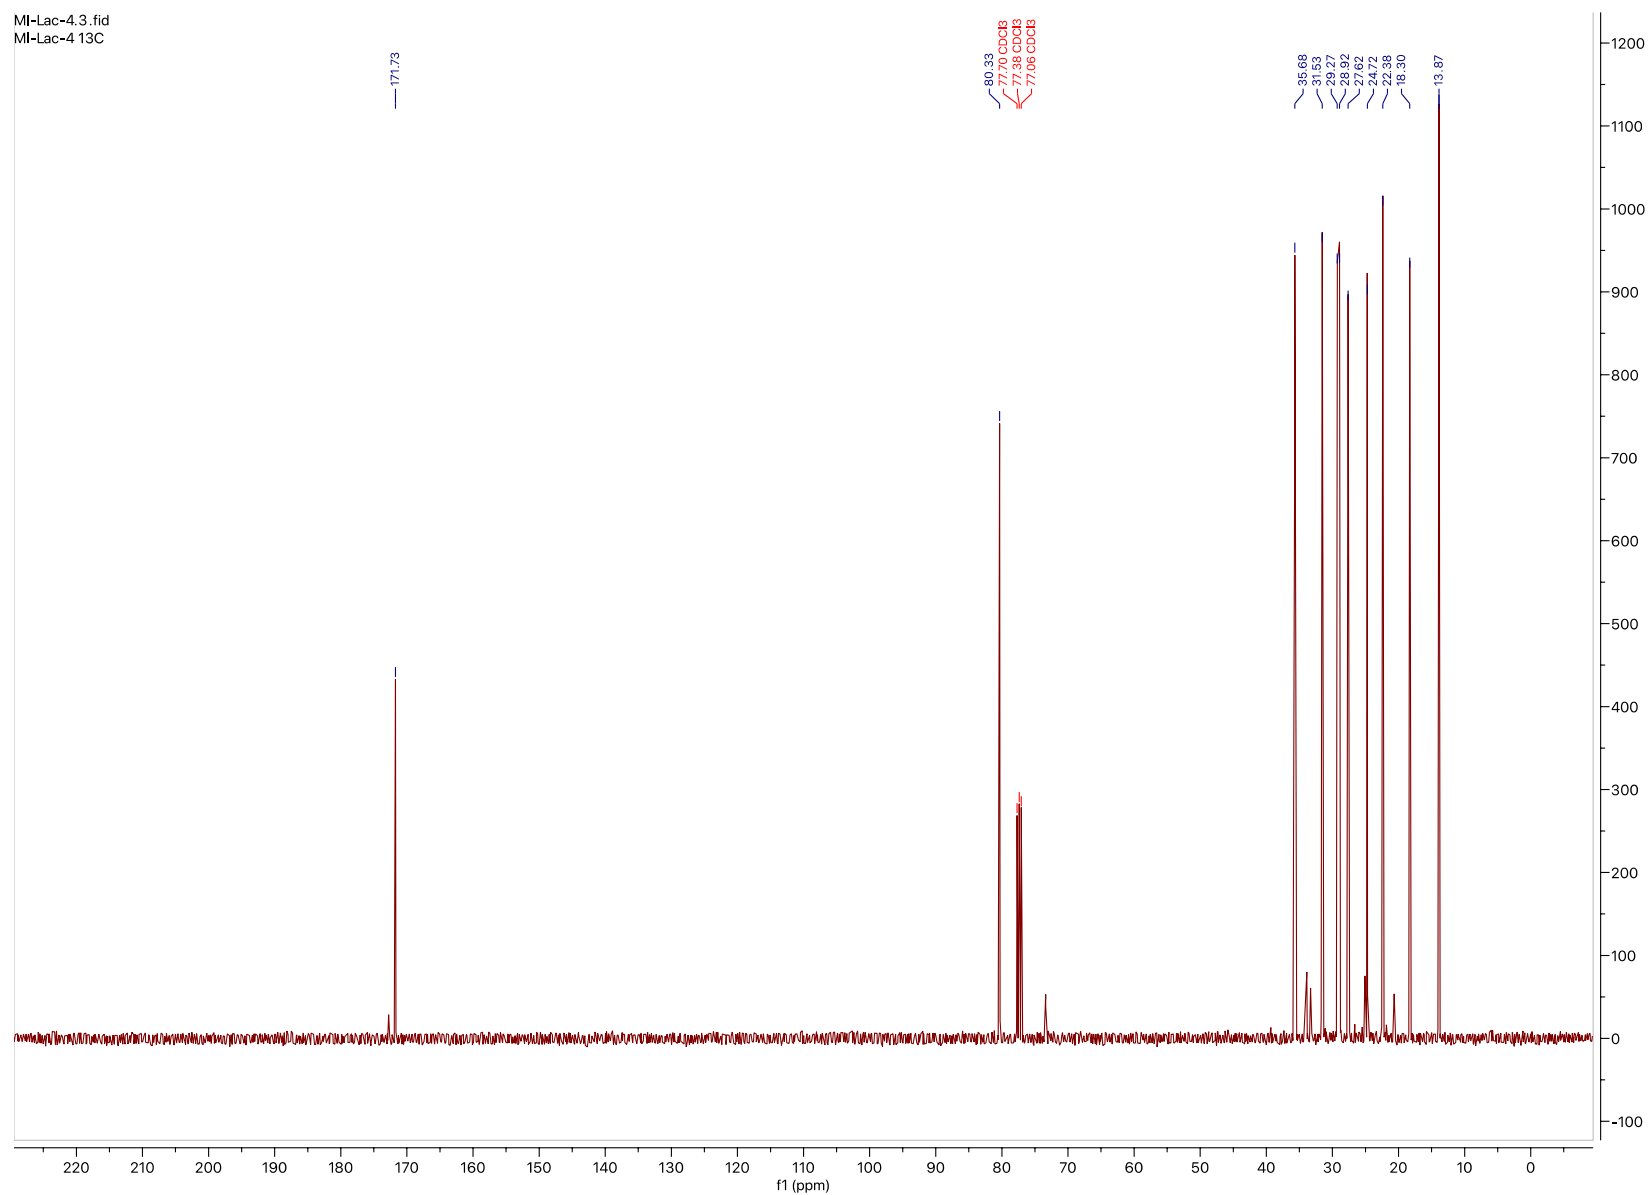

SI 17: <sup>13</sup>C NMR spectrum of **5** [100 MHz, CDCl<sub>3</sub>]



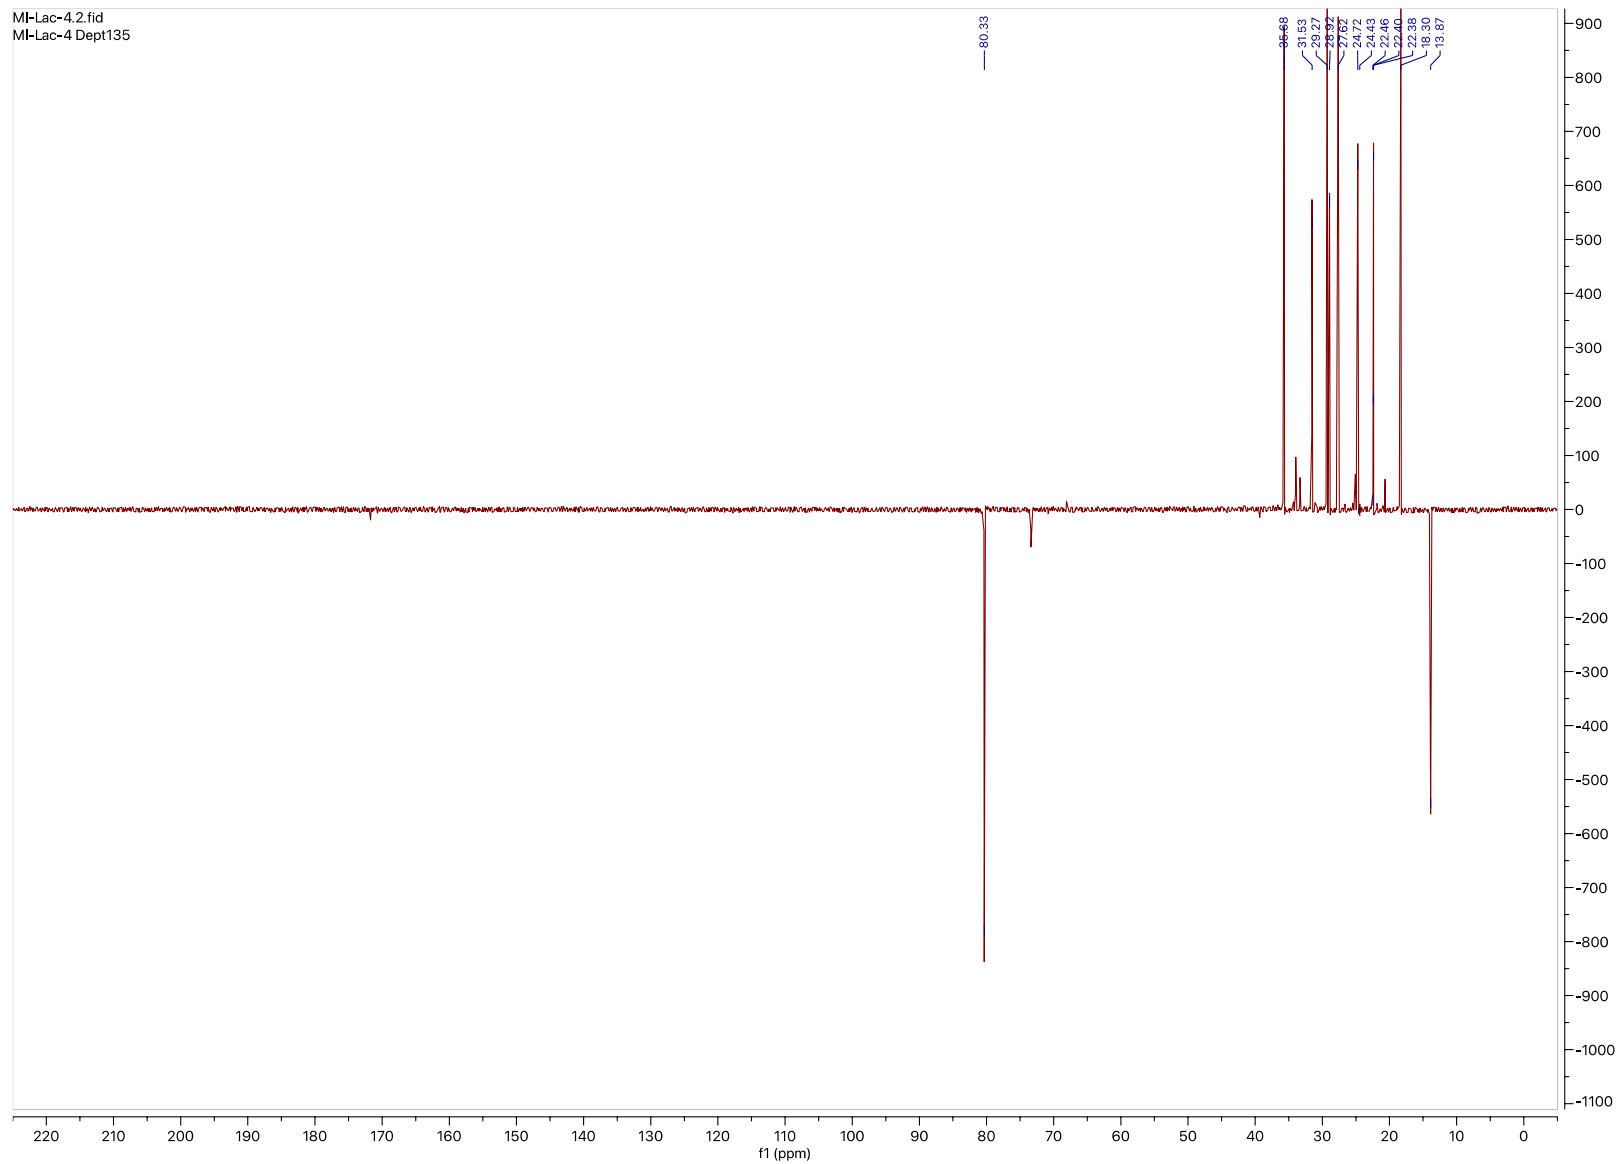

**SI 18:** Dept-135 NMR spectrum of **5** [400 MHz,  $\text{CDCl}_3$ ]

MI-Lac-5.1.fid  
MI-Lac-5 1H

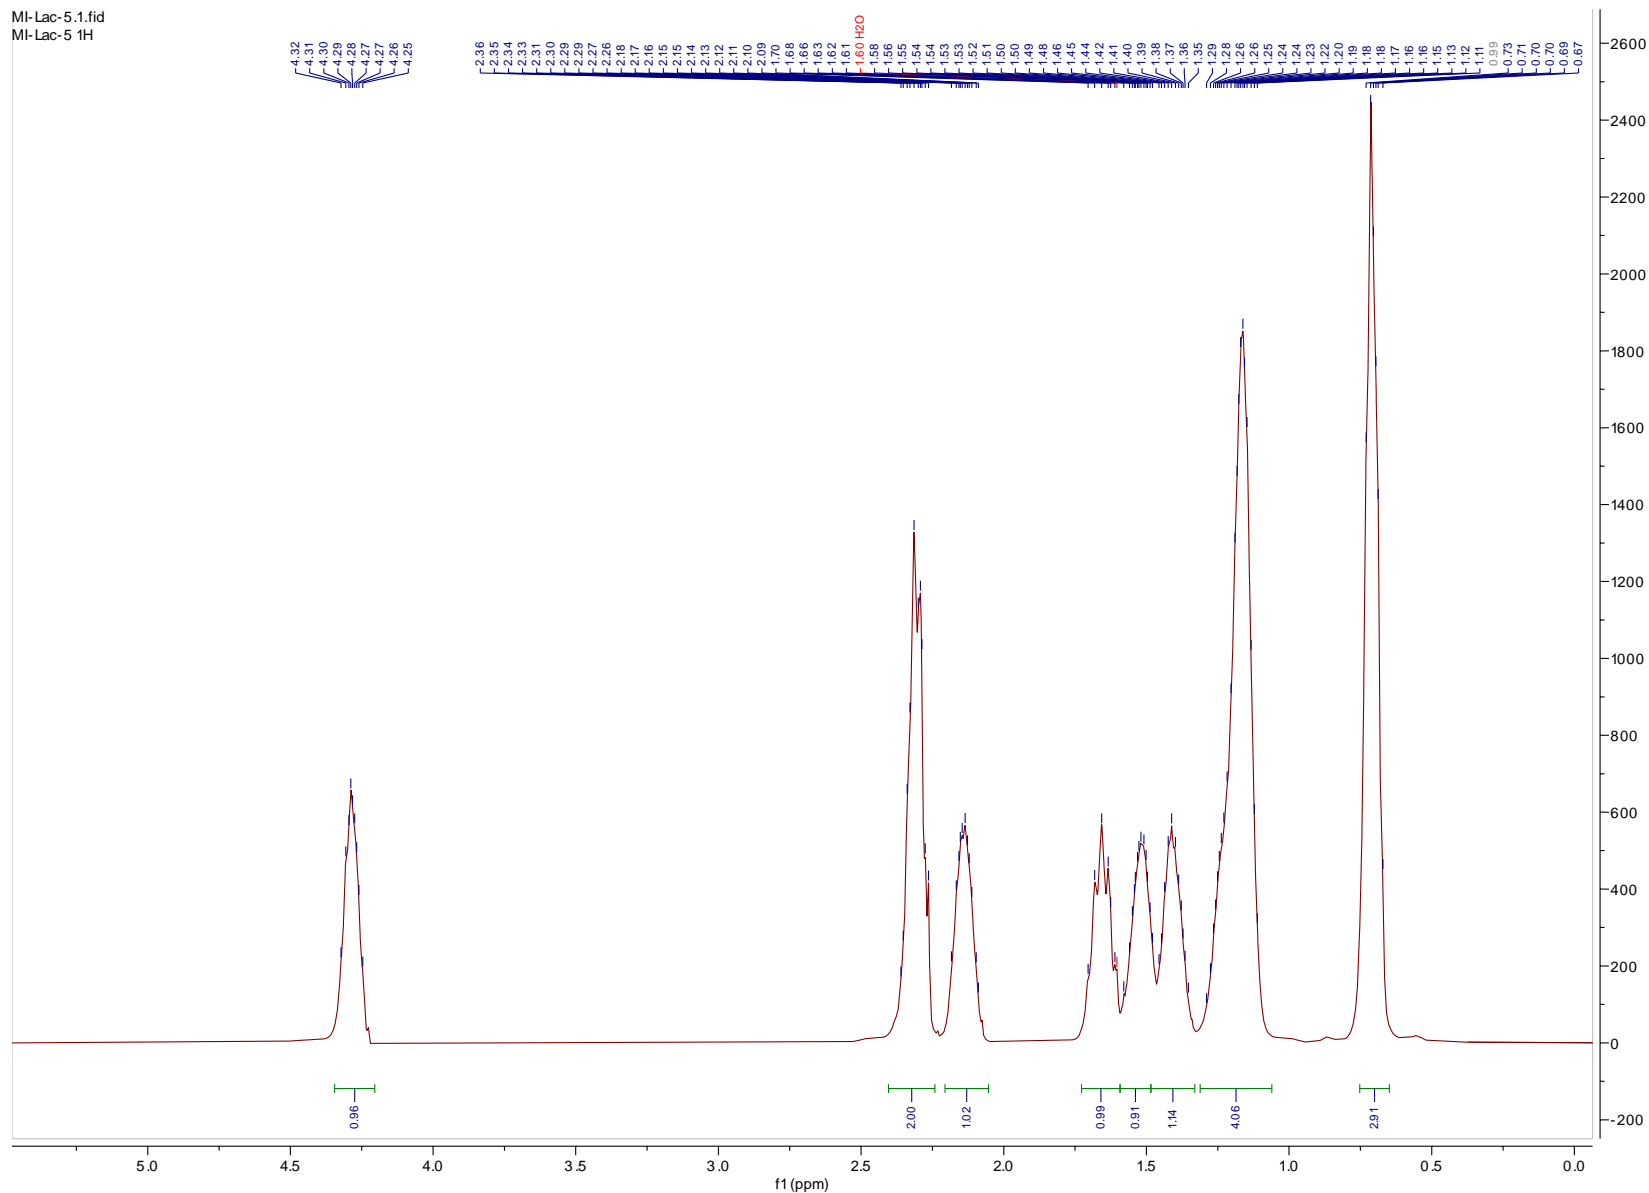

SI 20:  $^1\text{H}$  NMR spectrum of **6** [400 MHz,  $\text{CDCl}_3$ ]

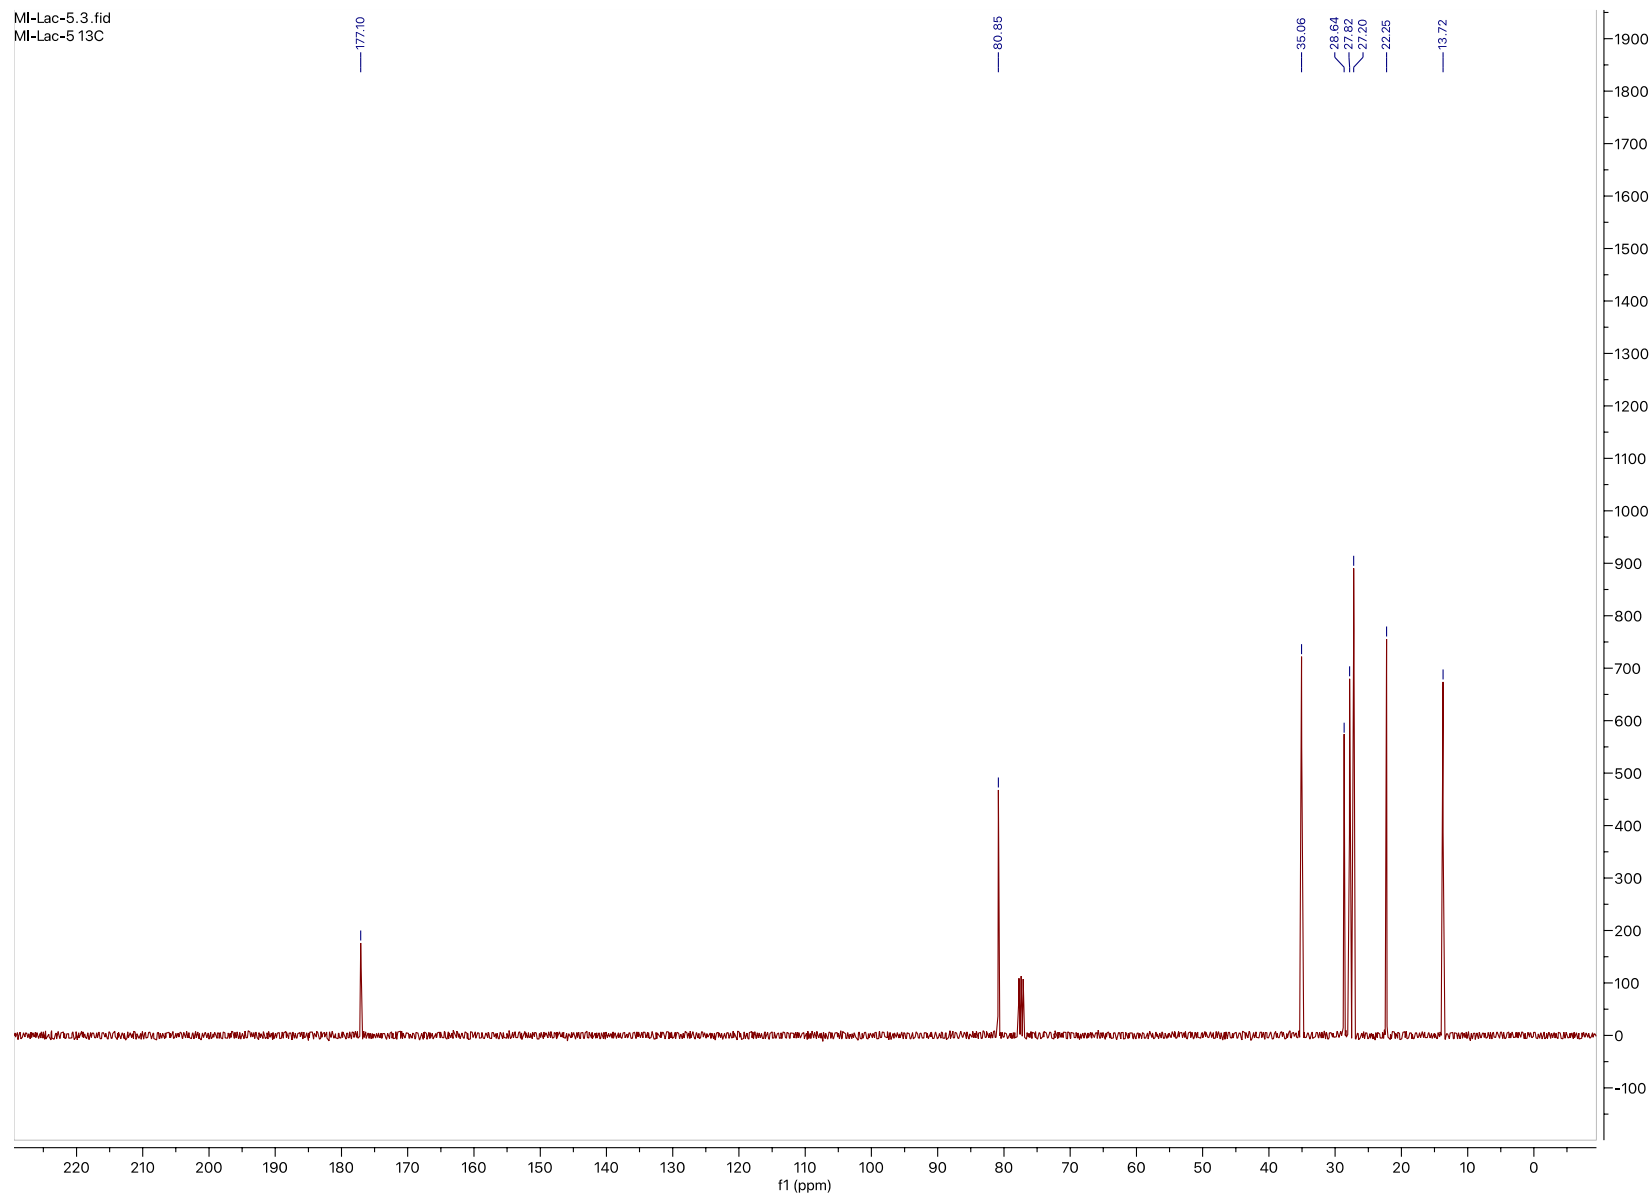

**SI 21:**  $^{13}\text{C}$  NMR spectrum of **6** [100 MHz,  $\text{CDCl}_3$ ]

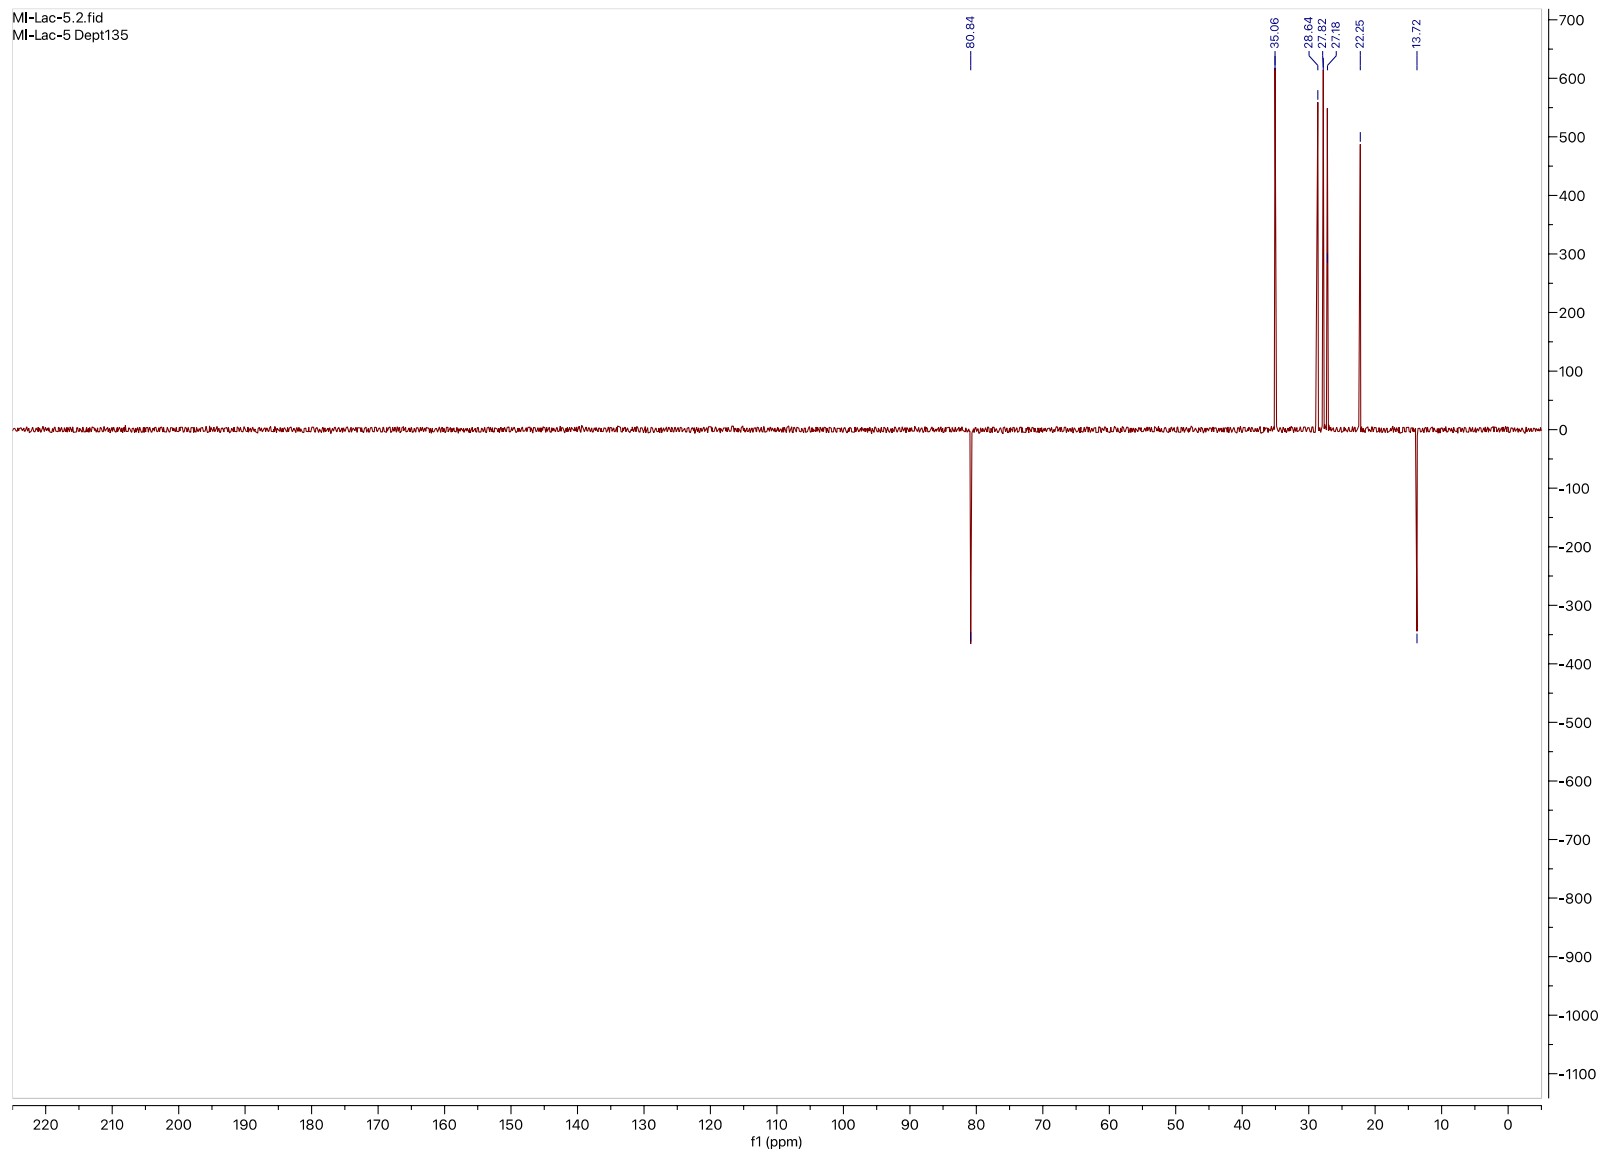

**SI 22:** Dept-135 NMR spectrum of **6** [400 MHz,  $\text{CDCl}_3$ ]

MI-Lac-6.1.fid  
MI-Lac-6 1H

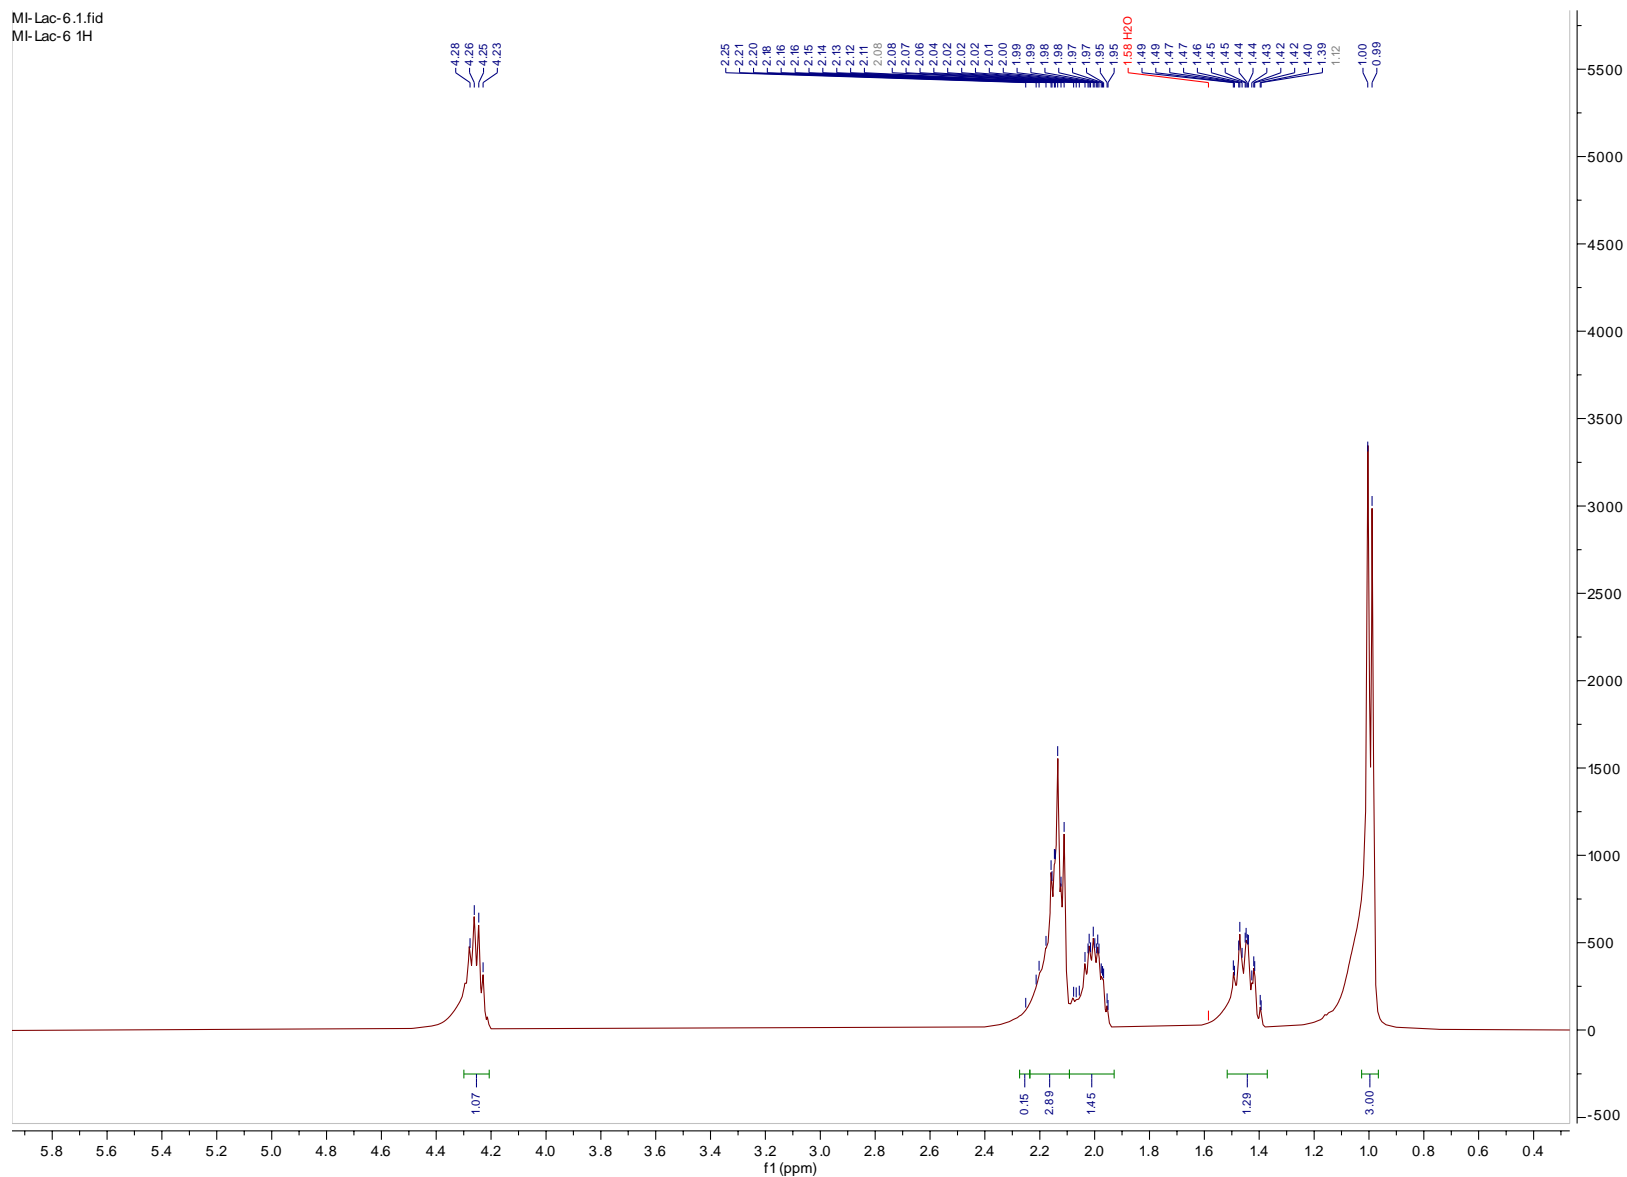

SI 24:  $^1\text{H}$  NMR spectrum of **7** [400 MHz,  $\text{CDCl}_3$ ]

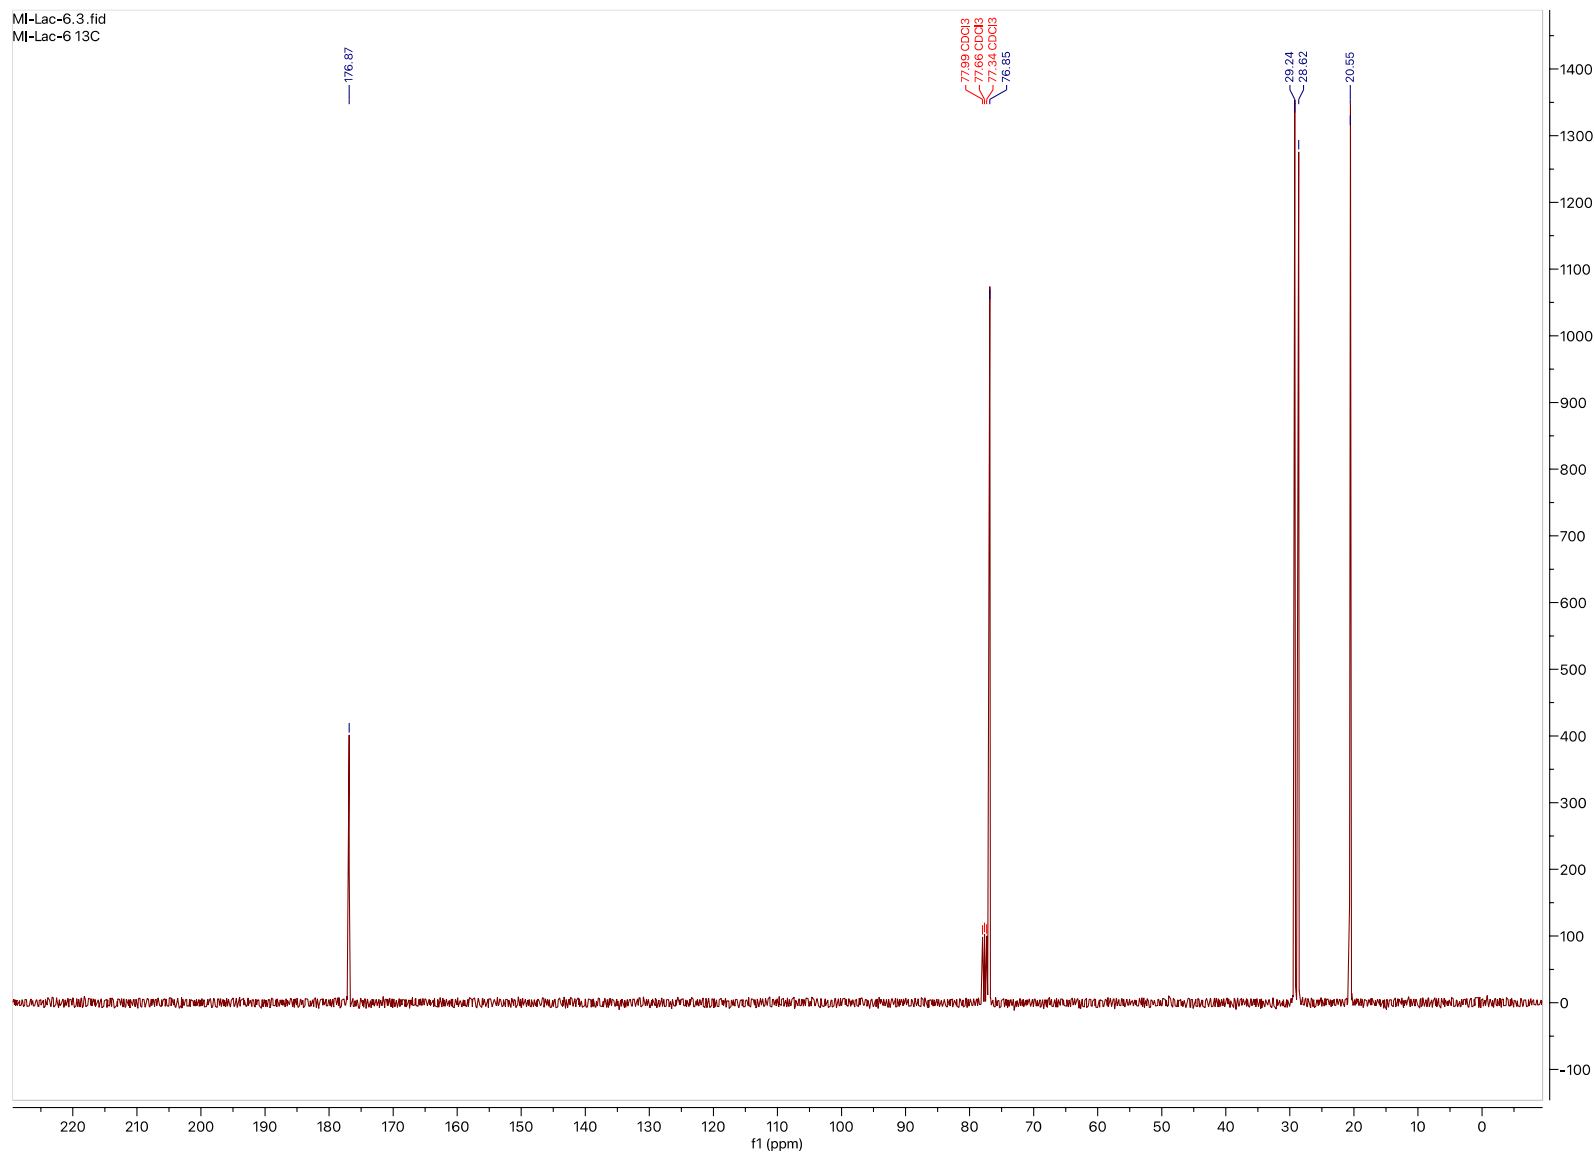

**SI 25:**  $^{13}\text{C}$  NMR spectrum of **7** [100 MHz,  $\text{CDCl}_3$ ]

MI-Lac-6.2.fid  
MI-Lac-6 Dept135

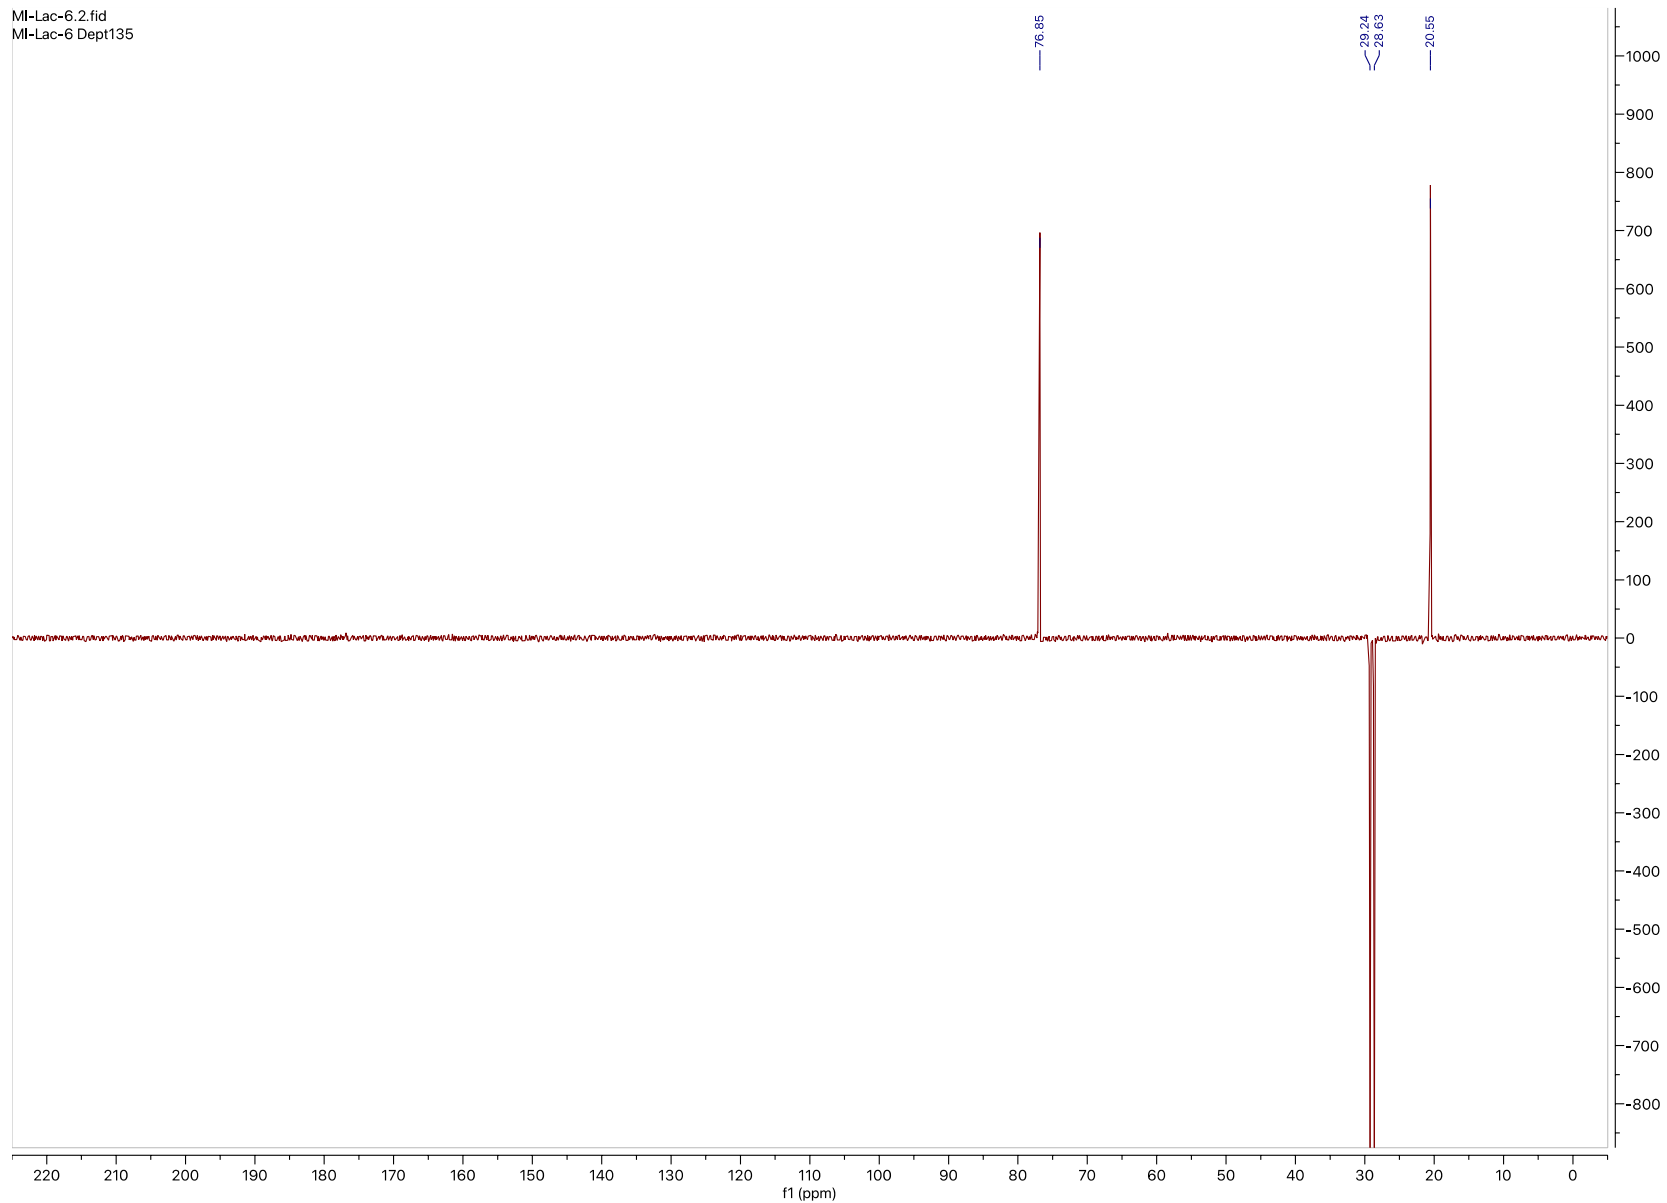

**SI 26:** Dept-135 NMR spectrum of **7** [400 MHz, CDCl<sub>3</sub>]

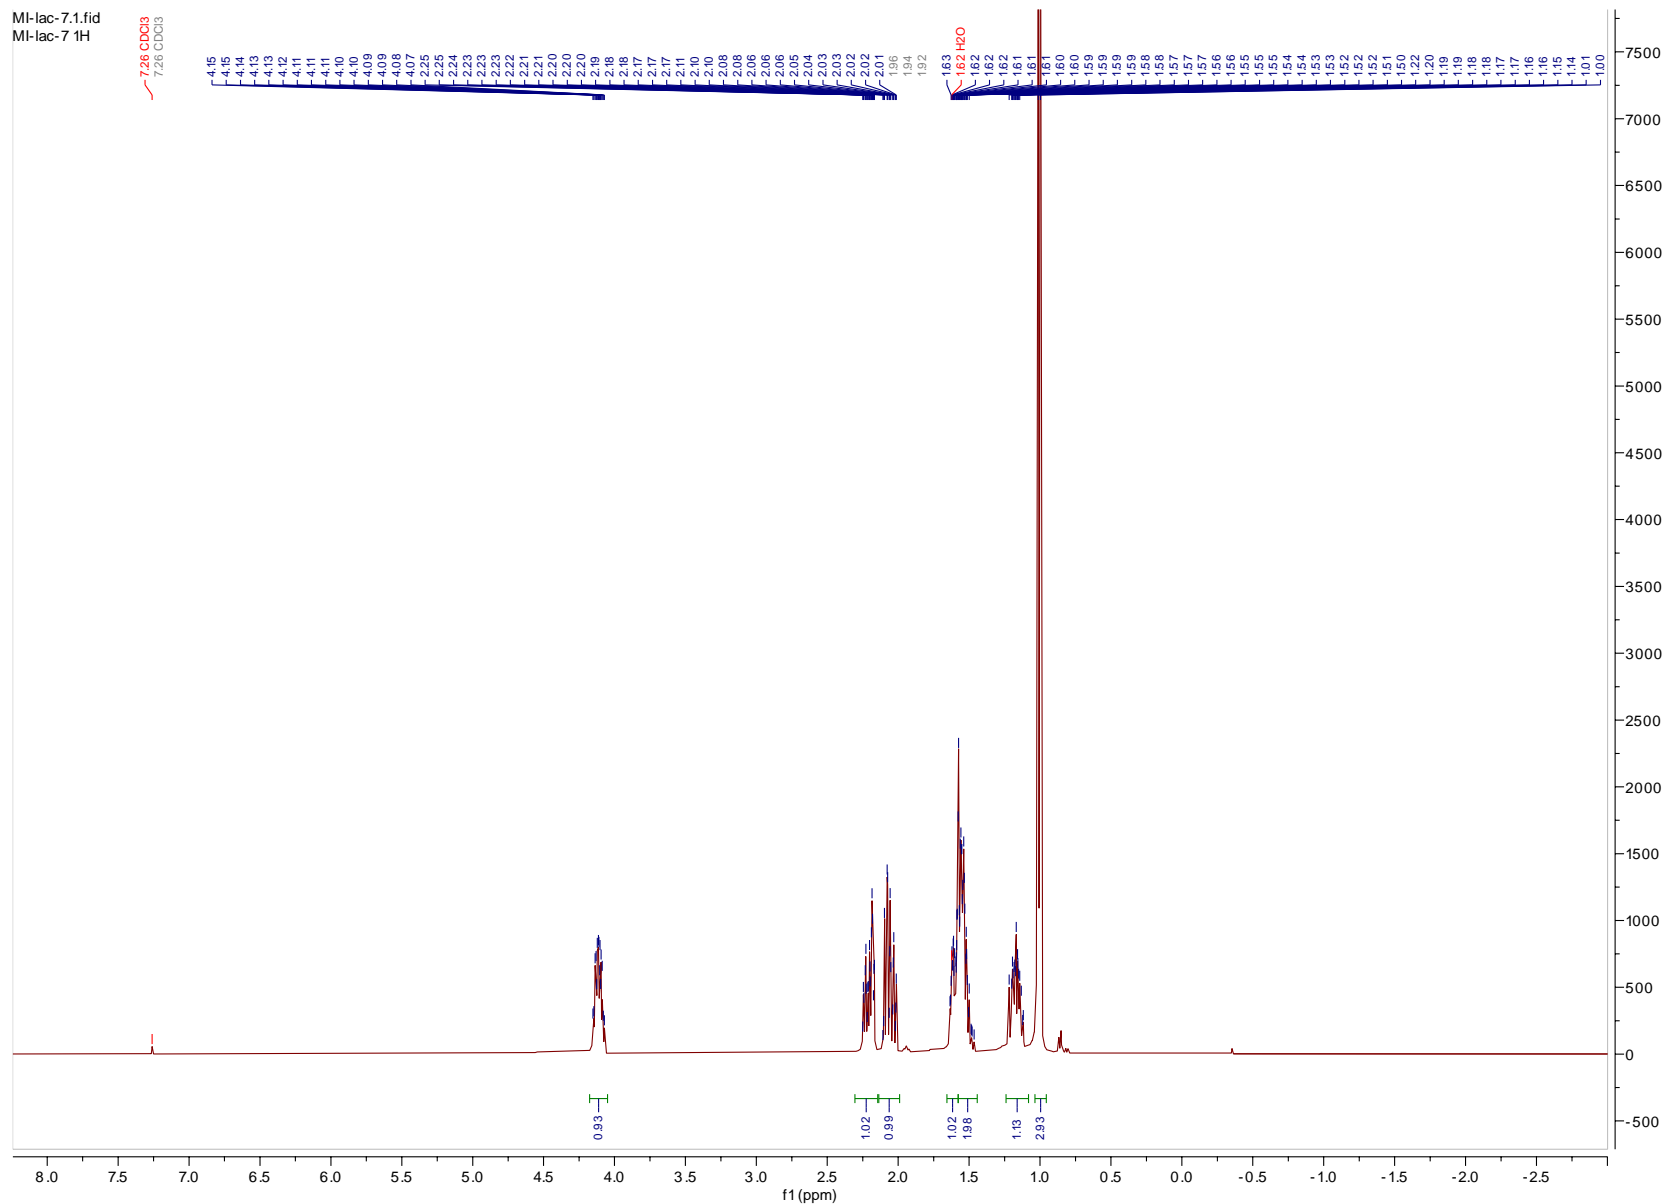

SI 24: <sup>1</sup>H NMR spectrum of **8** [400 MHz, CDCl<sub>3</sub>]



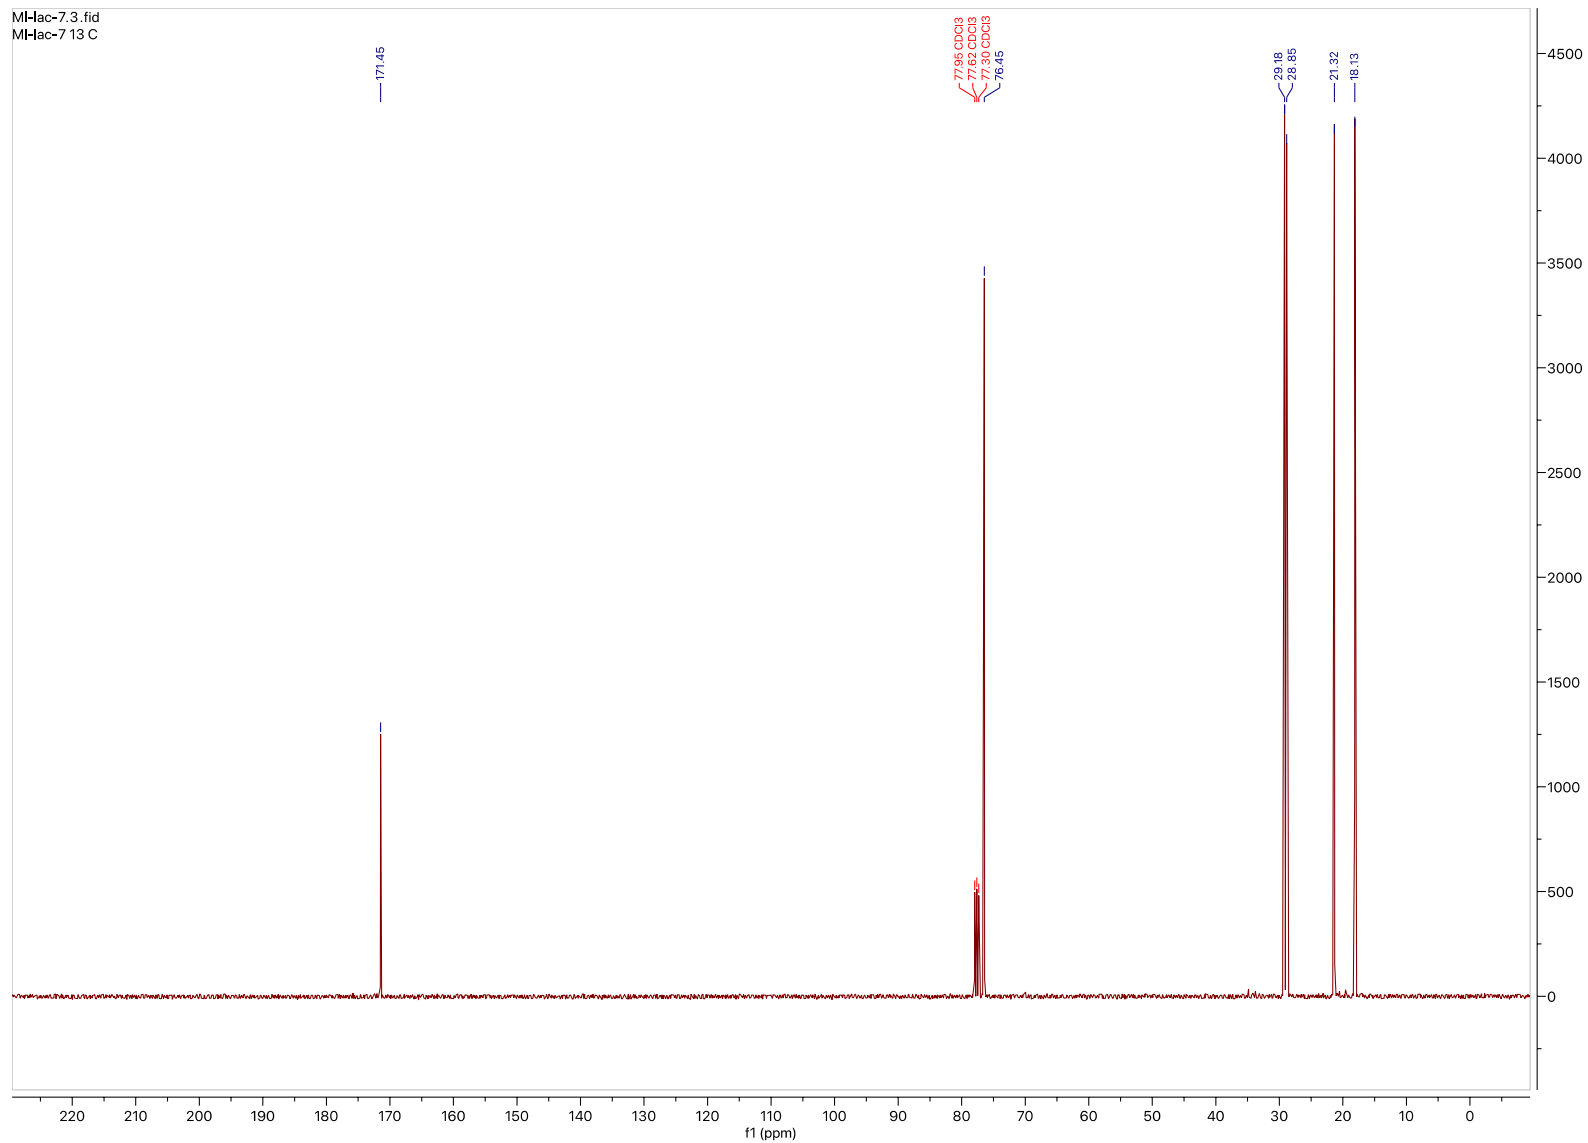

**SI 25:**  $^{13}\text{C}$  NMR spectrum of **8** [100 MHz,  $\text{CDCl}_3$ ]

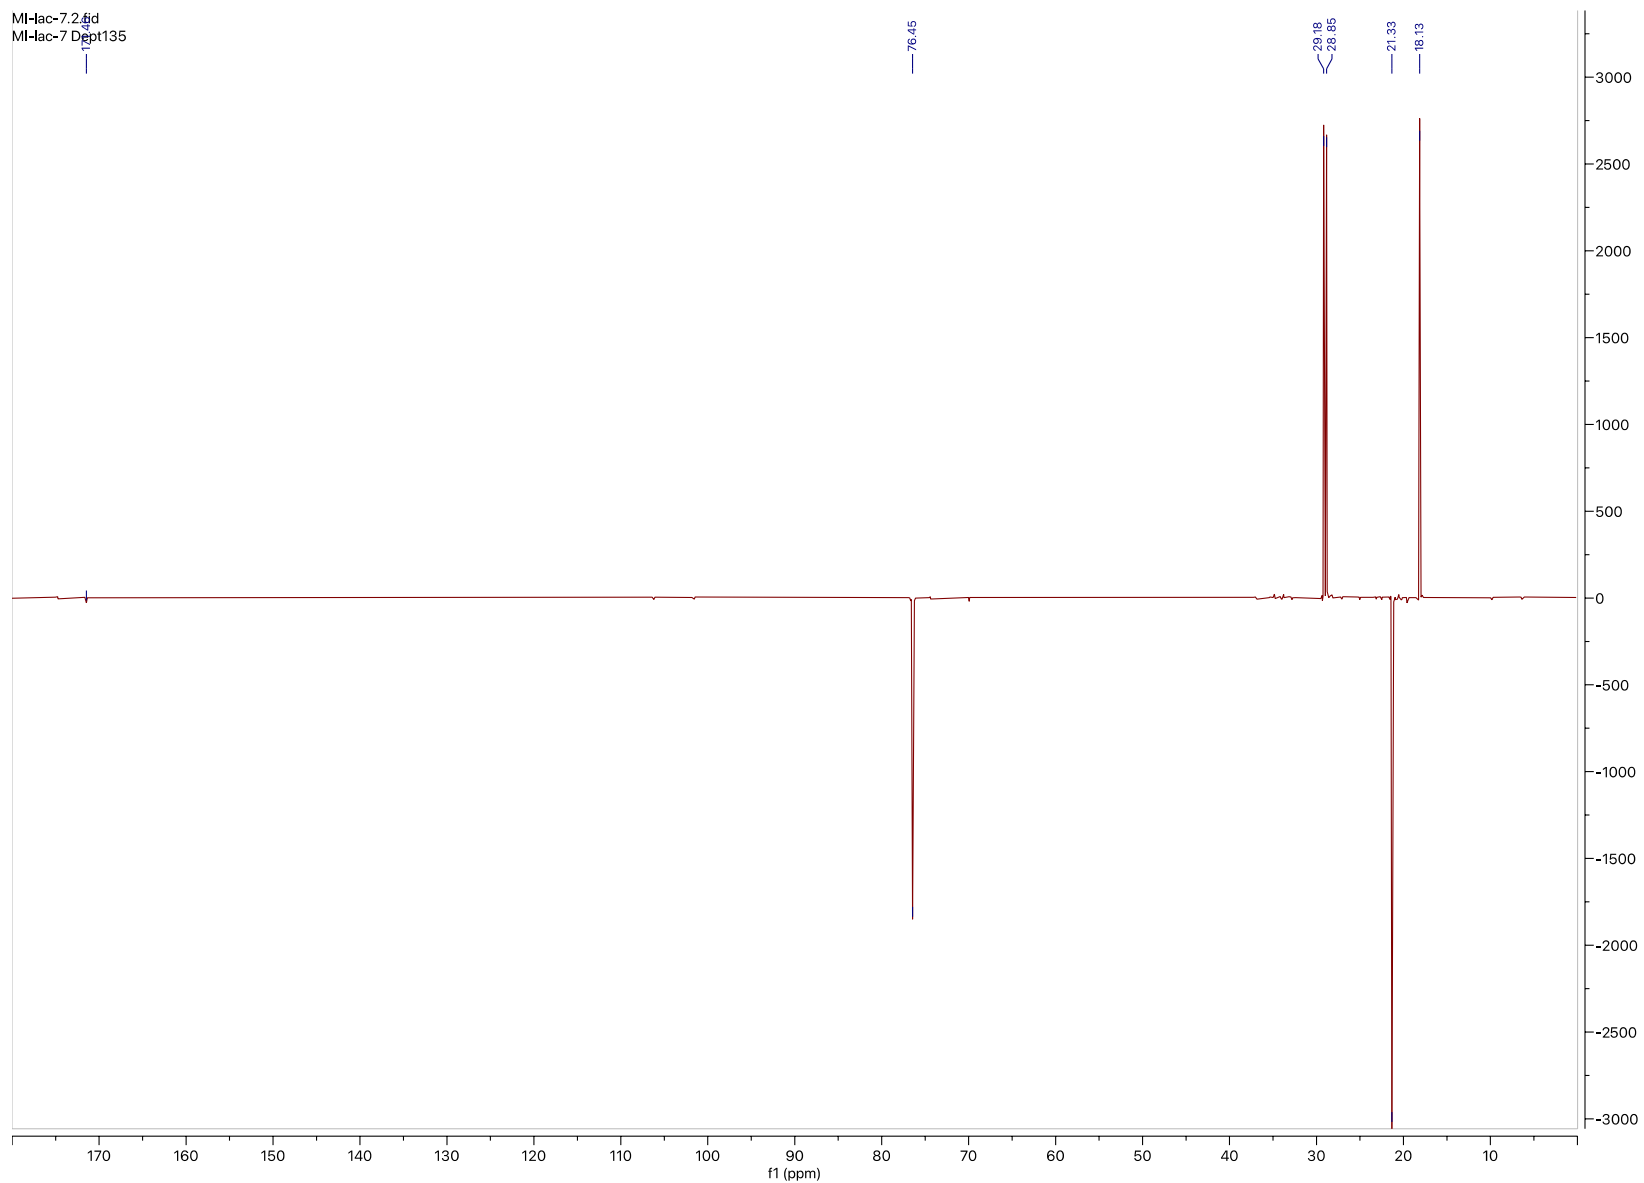

**SI 26:** Dept-135 NMR spectrum of **8** [400 MHz,  $\text{CDCl}_3$ ]

MI-Lac-8 new.1.fid  
MI-Lac-8 1H  
400N

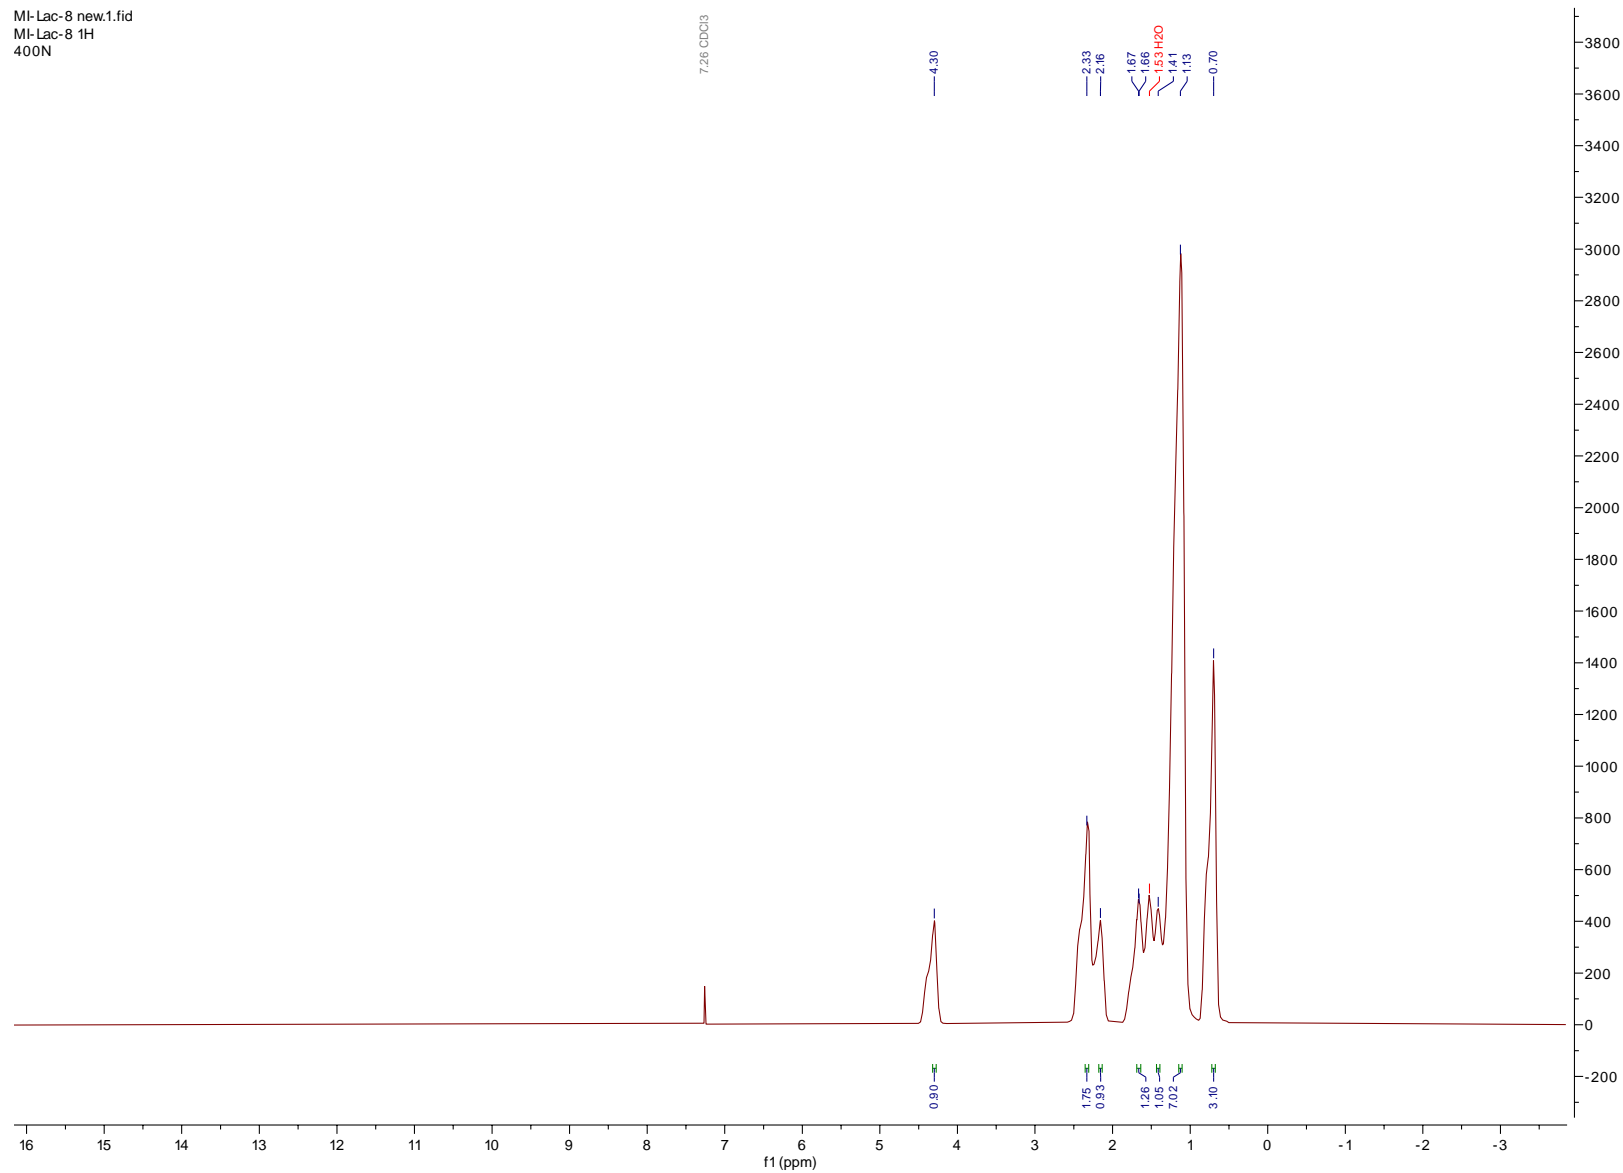

SI 24: <sup>1</sup>H NMR spectrum of **9** [400 MHz, CDCl<sub>3</sub>]

MI-Lac-8 new 3.fid  
MI-Lac-8 13C  
400N

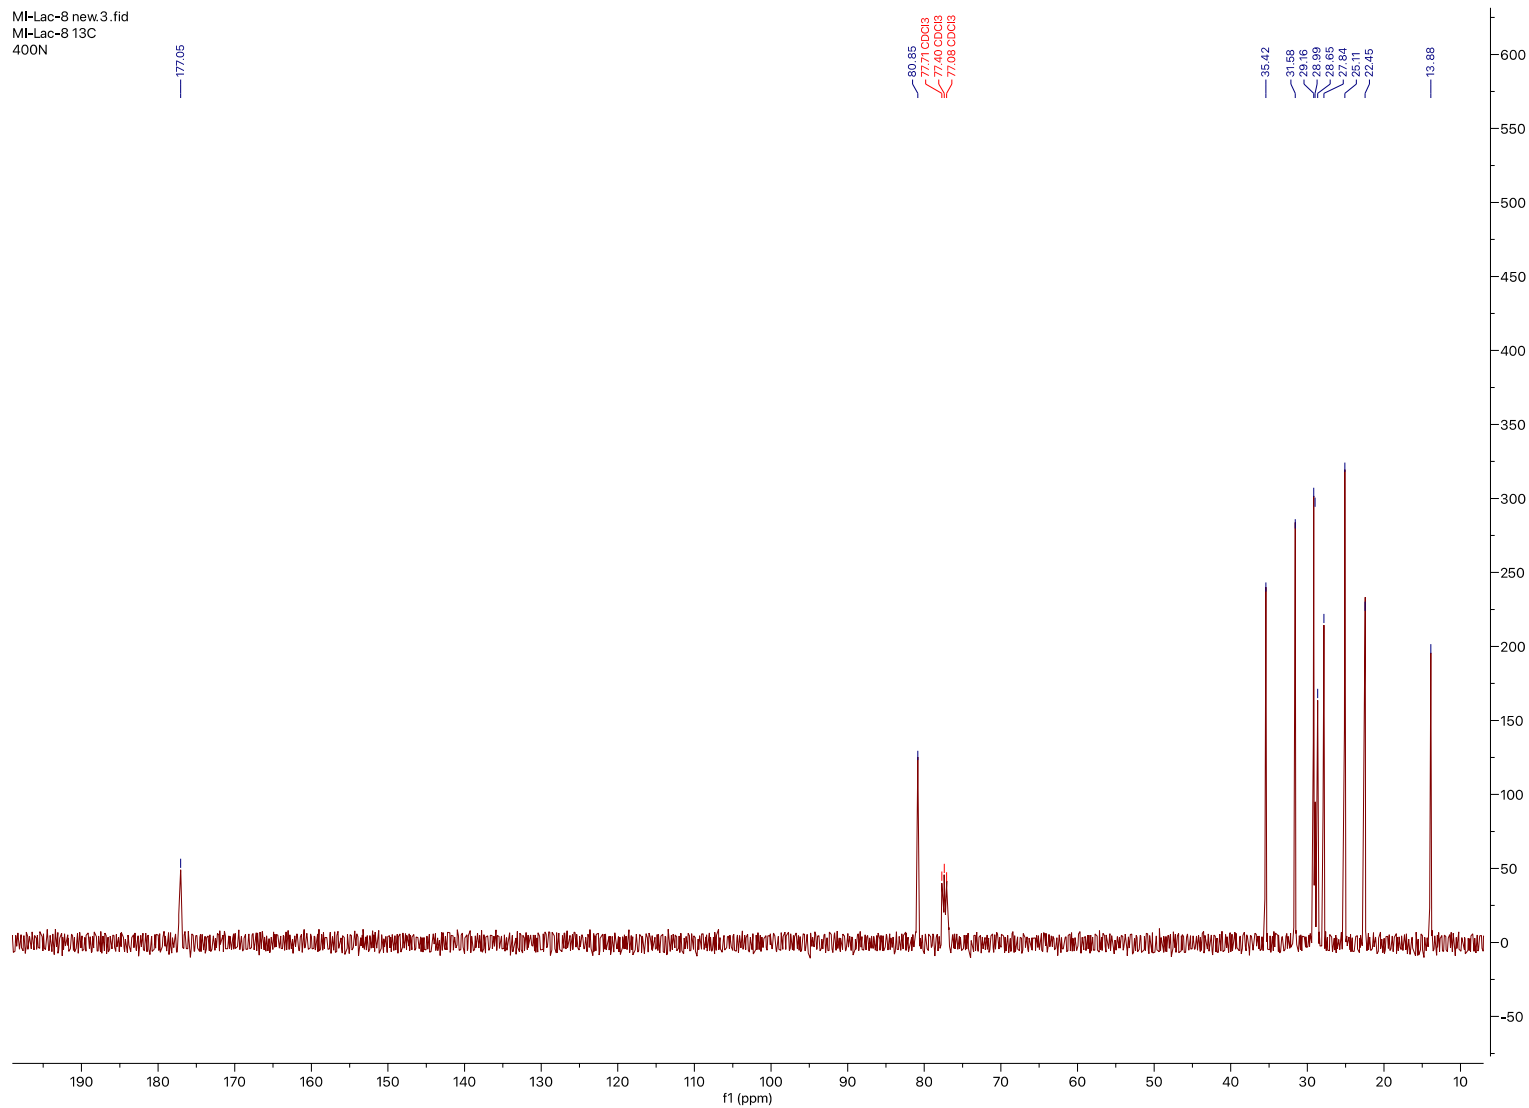

**SI 25:**  $^{13}\text{C}$  NMR spectrum of **9** [100 MHz,  $\text{CDCl}_3$ ]

MI-Lac-8 new.2.fid  
MI-Lac-8 DEPT135  
400N

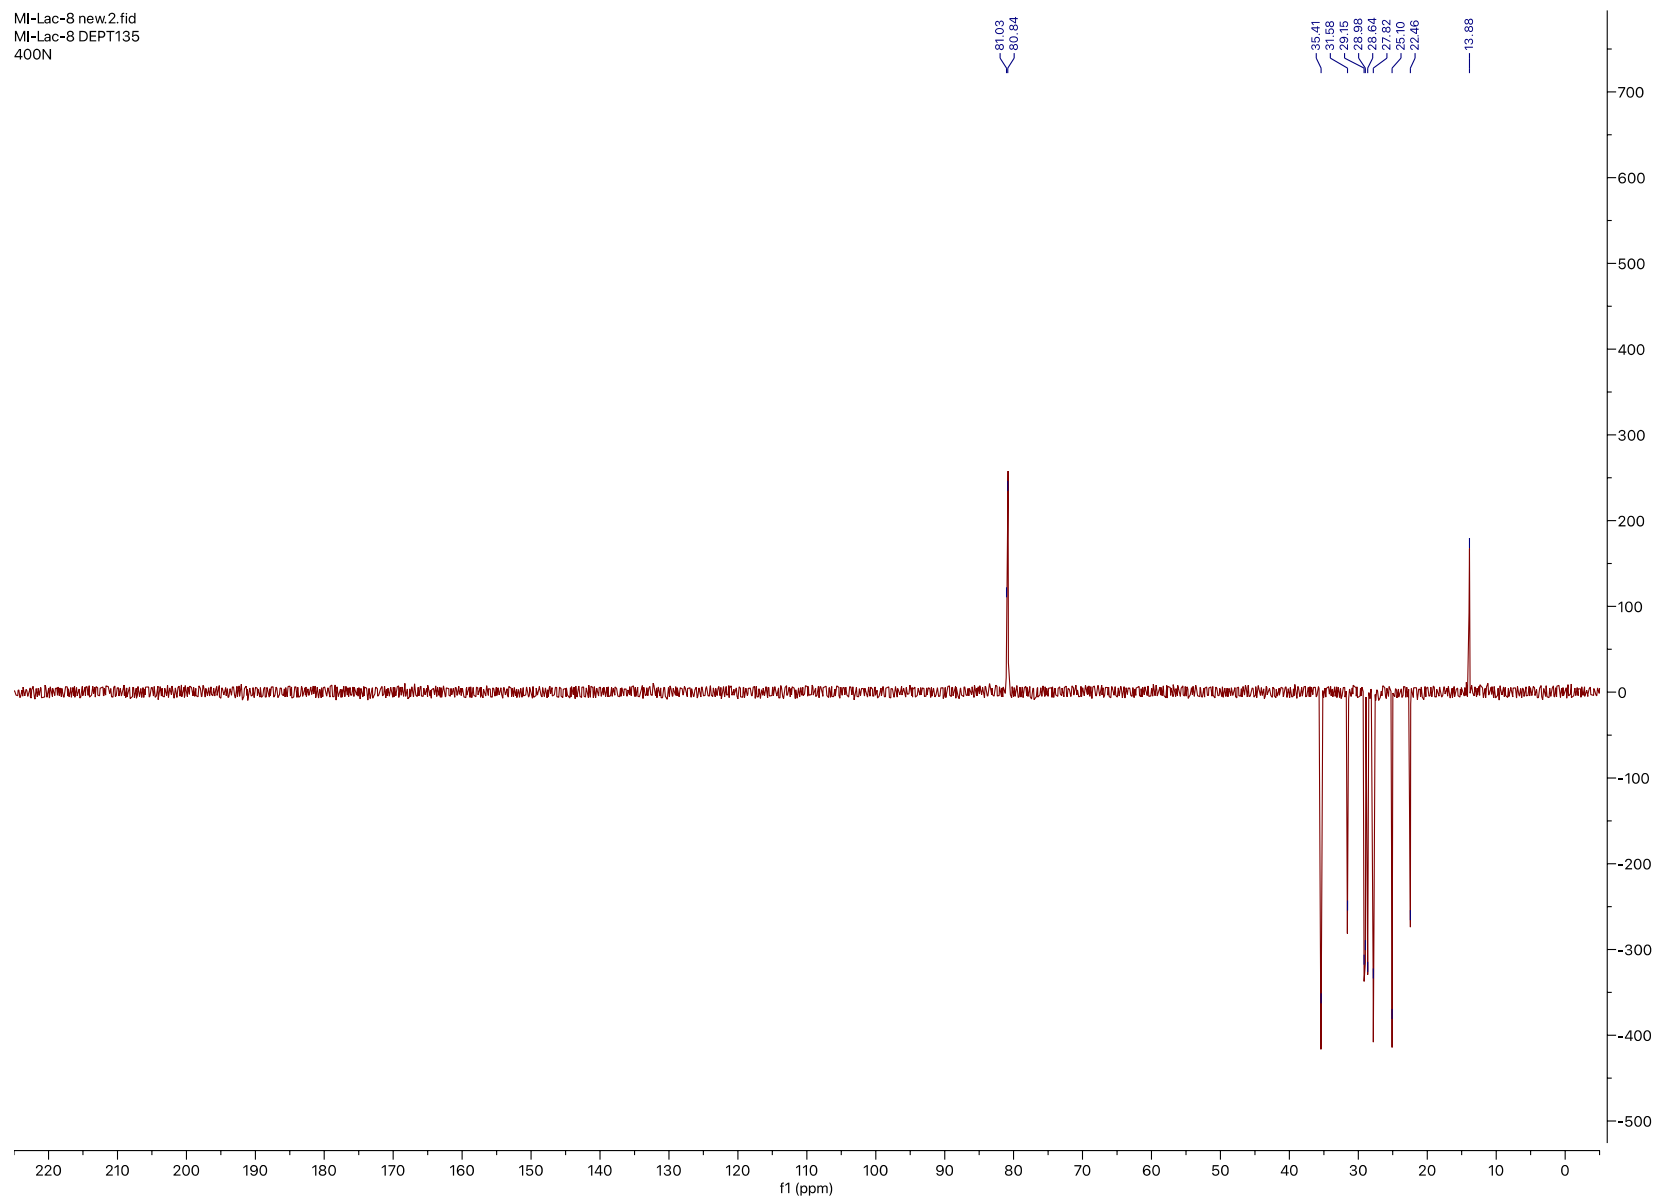

**SI 26:** Dept-135 NMR spectrum of **9** [400 MHz,  $\text{CDCl}_3$ ]

MI-Lac-9 new.1.fid  
MI-Lac-9 1H  
400N

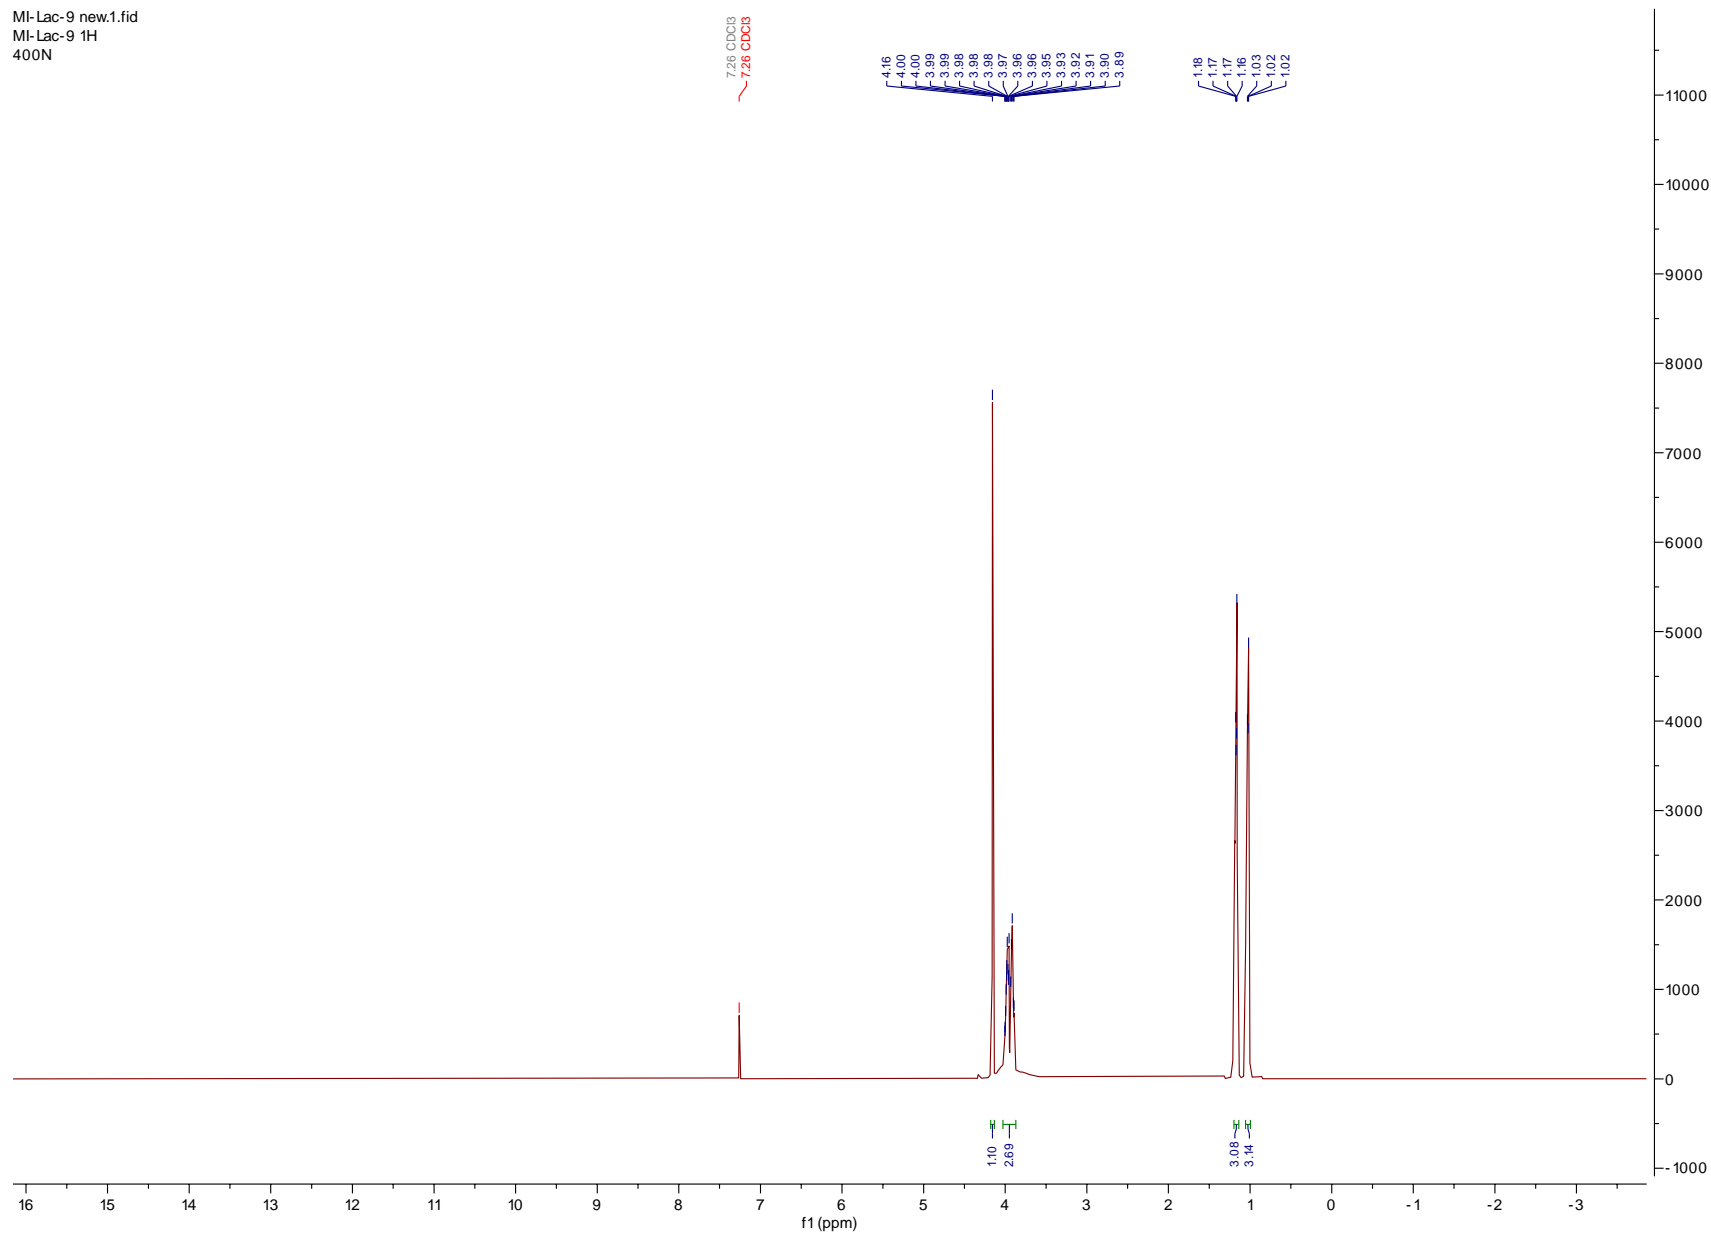

**SI 24:** <sup>1</sup>H NMR spectrum of **10** [400 MHz, CDCl<sub>3</sub>]

MI-Lac-9 new 3.fid  
MI-Lac-9 13C  
400N

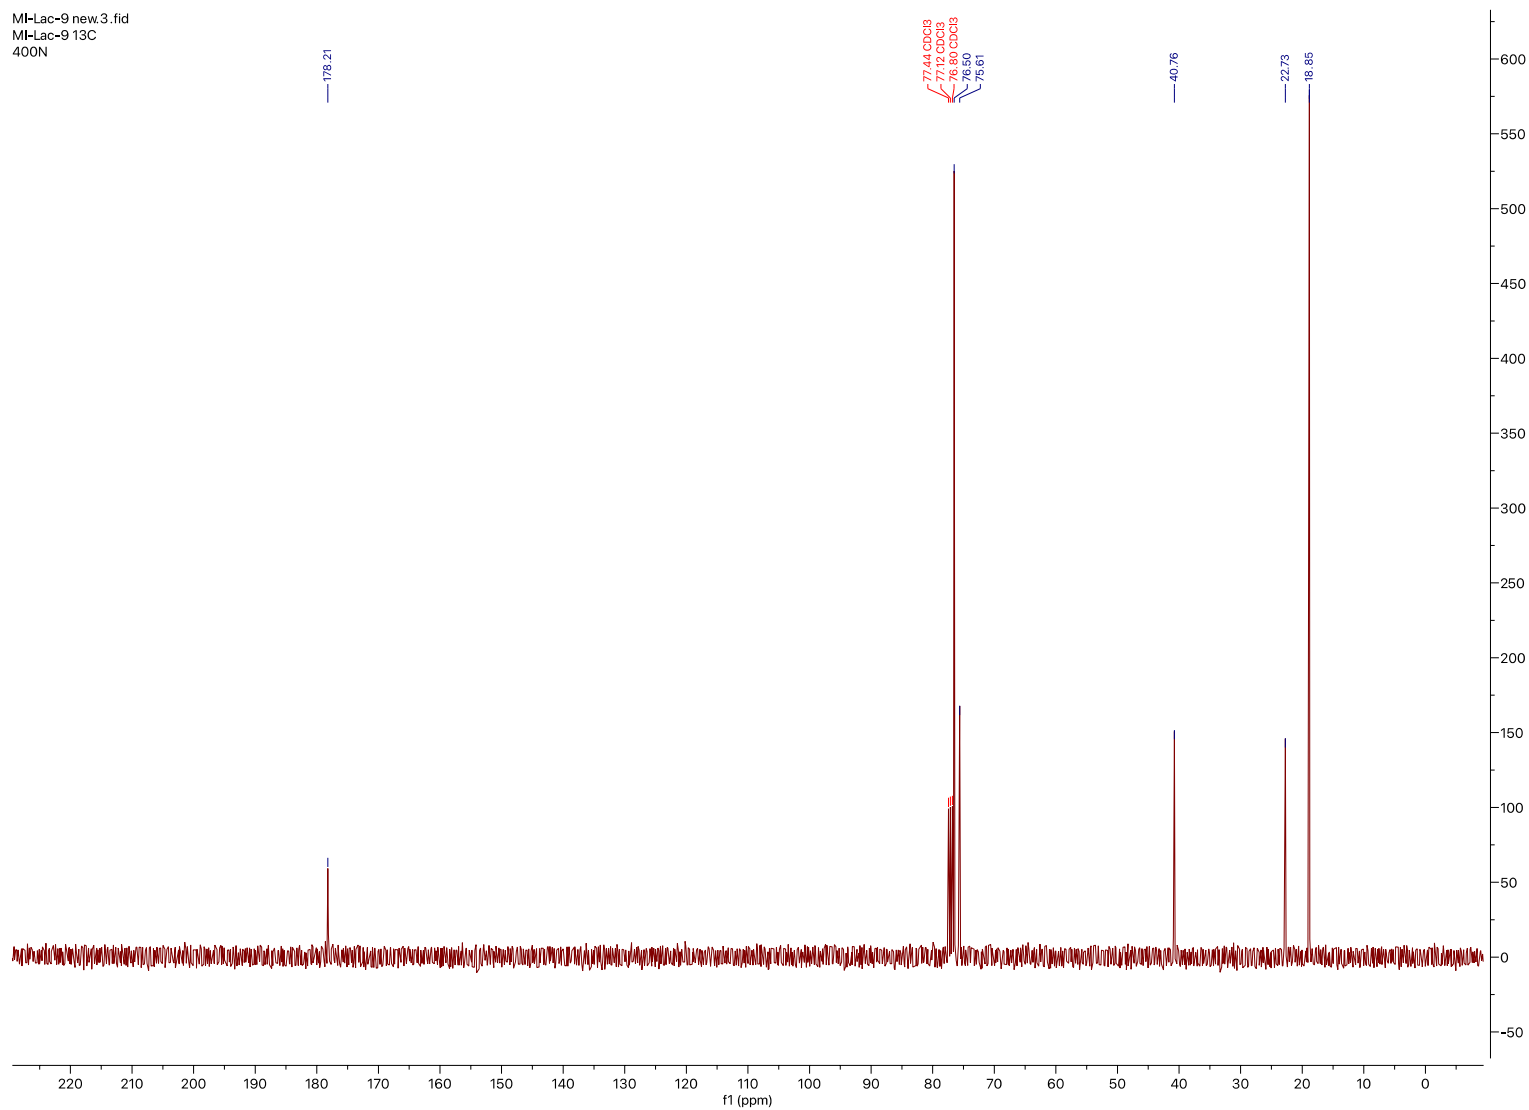

**SI 25:** <sup>13</sup>C NMR spectrum of **10** [100 MHz, CDCl<sub>3</sub>]

MI-Lac-9 new2.fid  
MI-Lac-9 Dept135  
400N

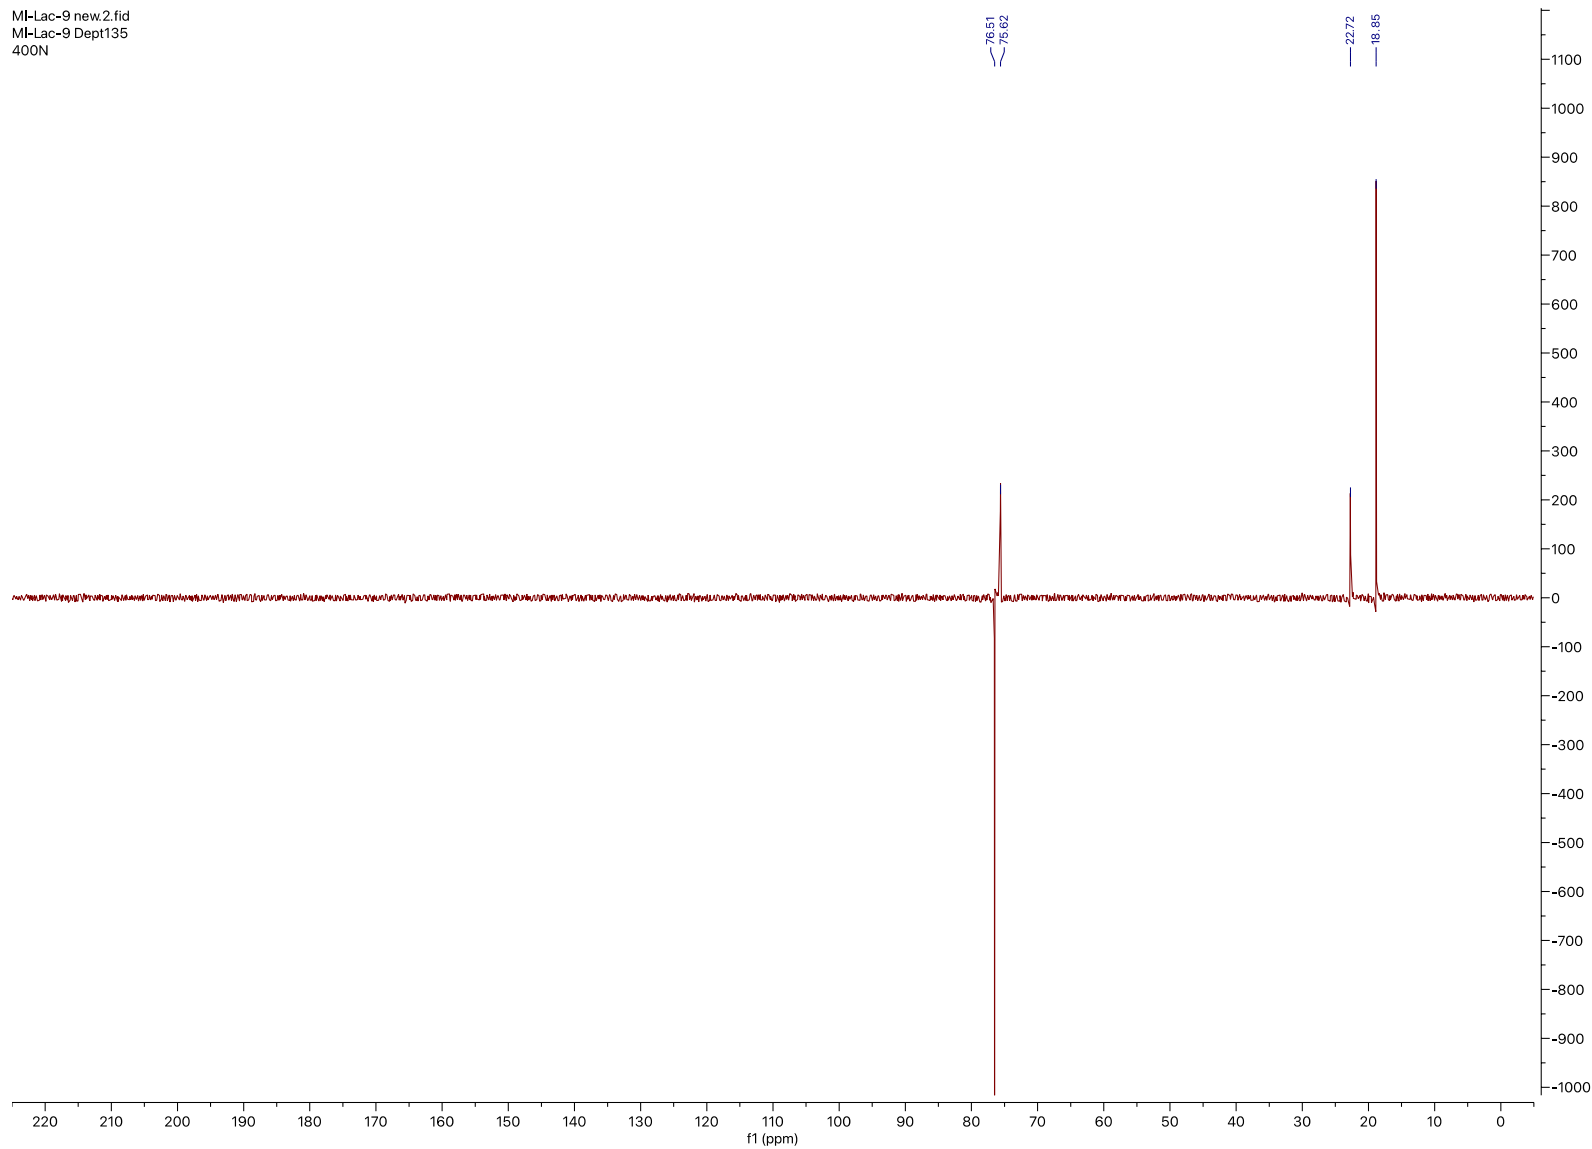

**SI 26:** Dept-135 NMR spectrum of **10** [400 MHz,  $CDCl_3$ ]



MI-Lac-10 new.1.fid  
MI-Lac-10 1H  
400N

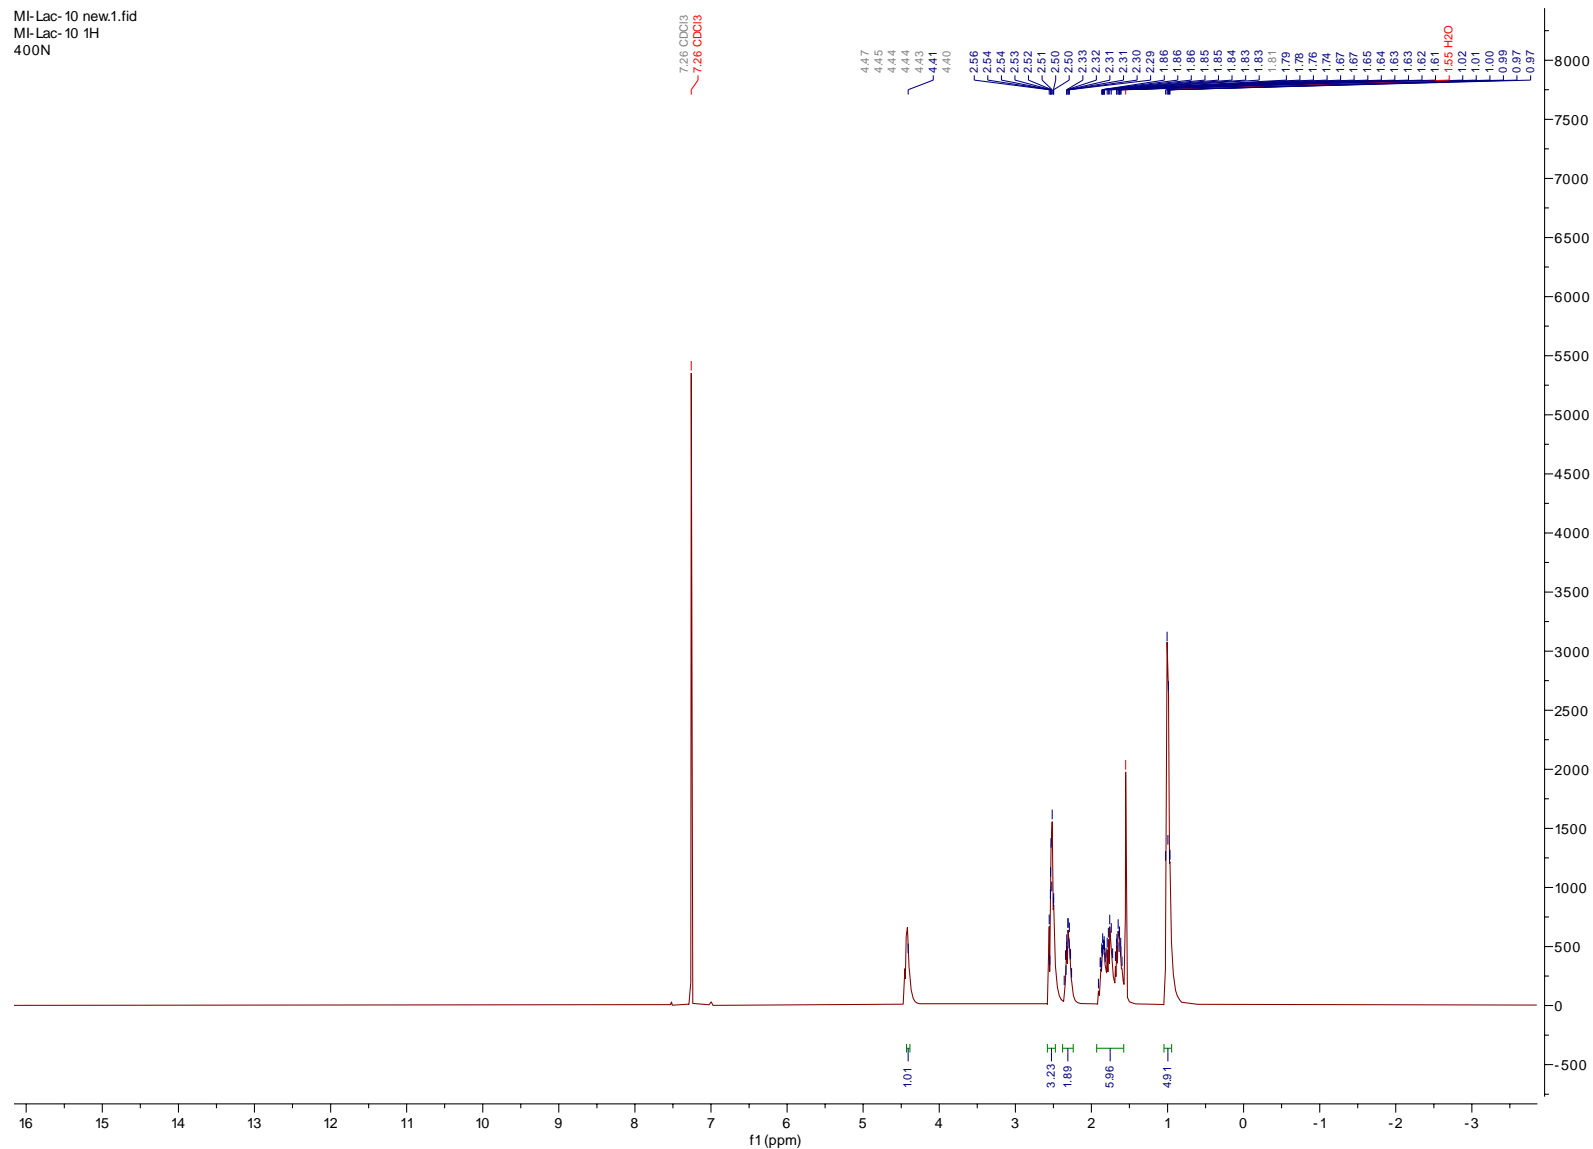

SI 24:  $^1\text{H}$  NMR spectrum of **11** [400 MHz,  $\text{CDCl}_3$ ]

MI-Lac-10 new.3.fid  
MI-Lac-10 13C  
400N

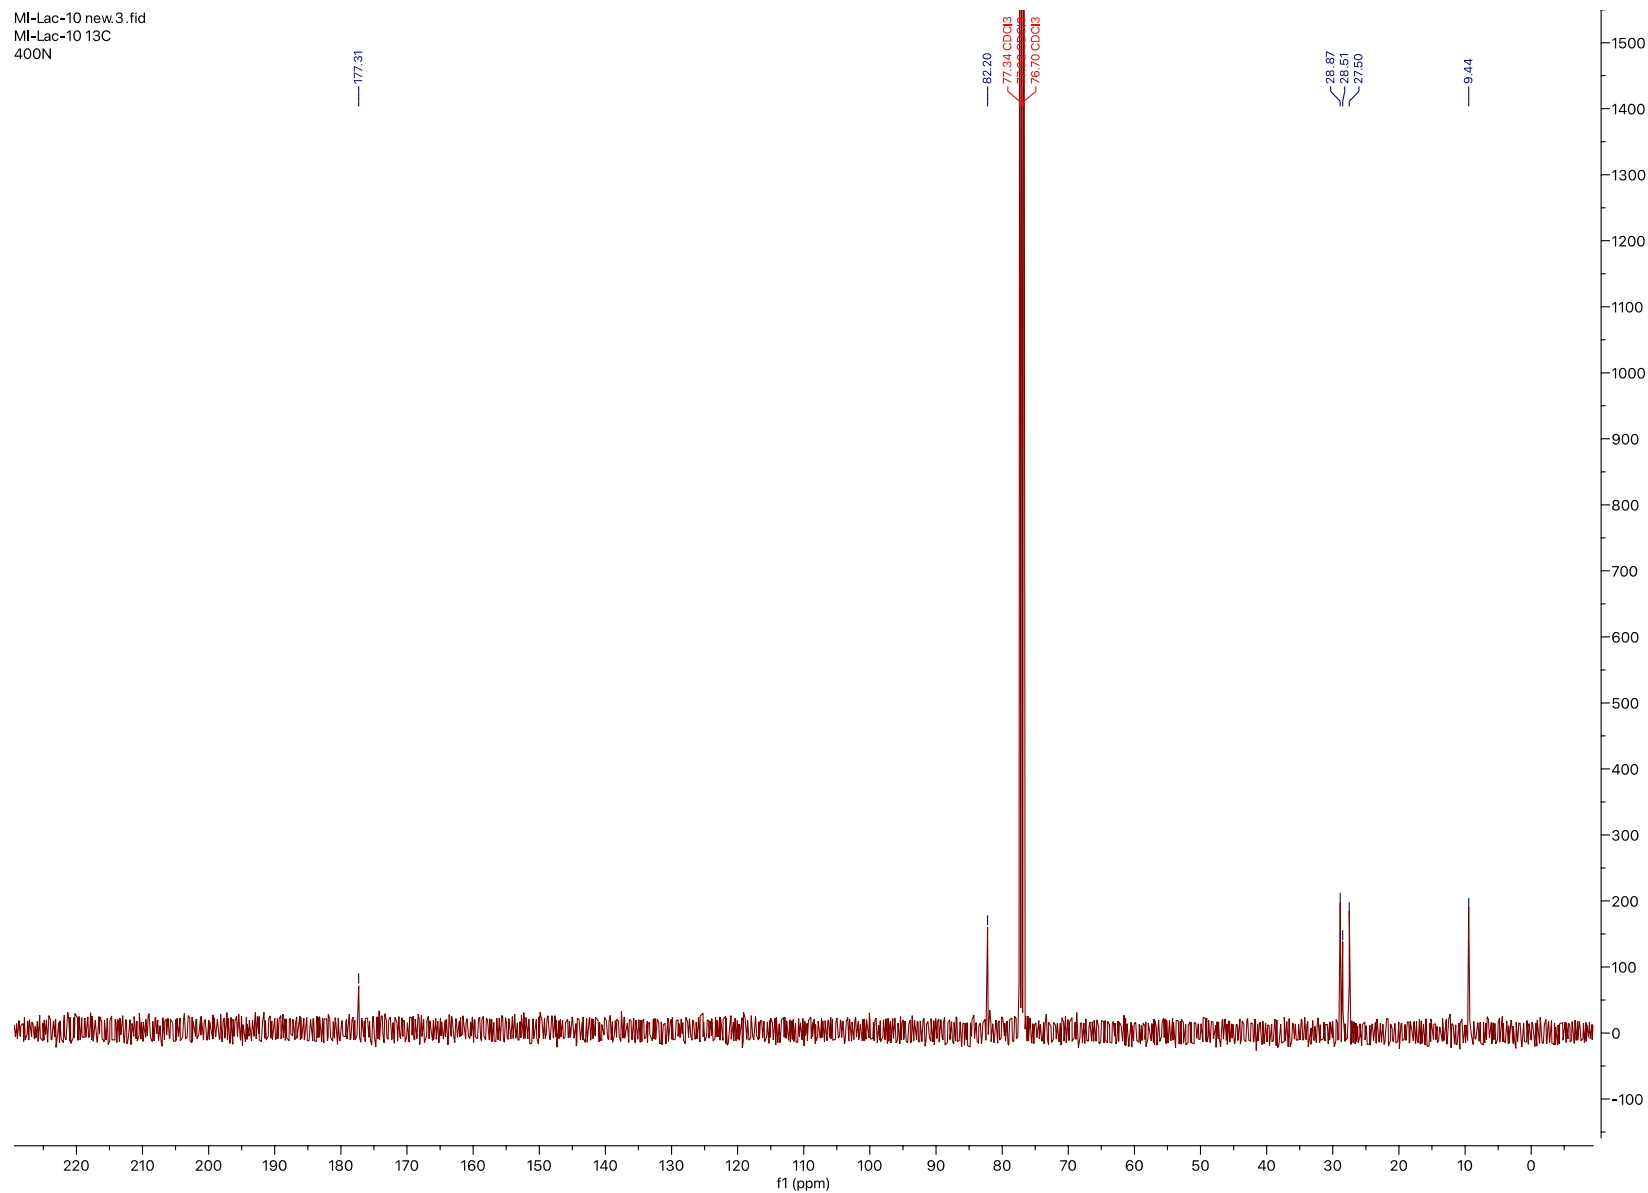

**SI 25:**  $^{13}\text{C}$  NMR spectrum of **11** [100 MHz,  $\text{CDCl}_3$ ]

MI-Lac-10 new.2.fid  
MI-Lac-10 Dept135  
400N

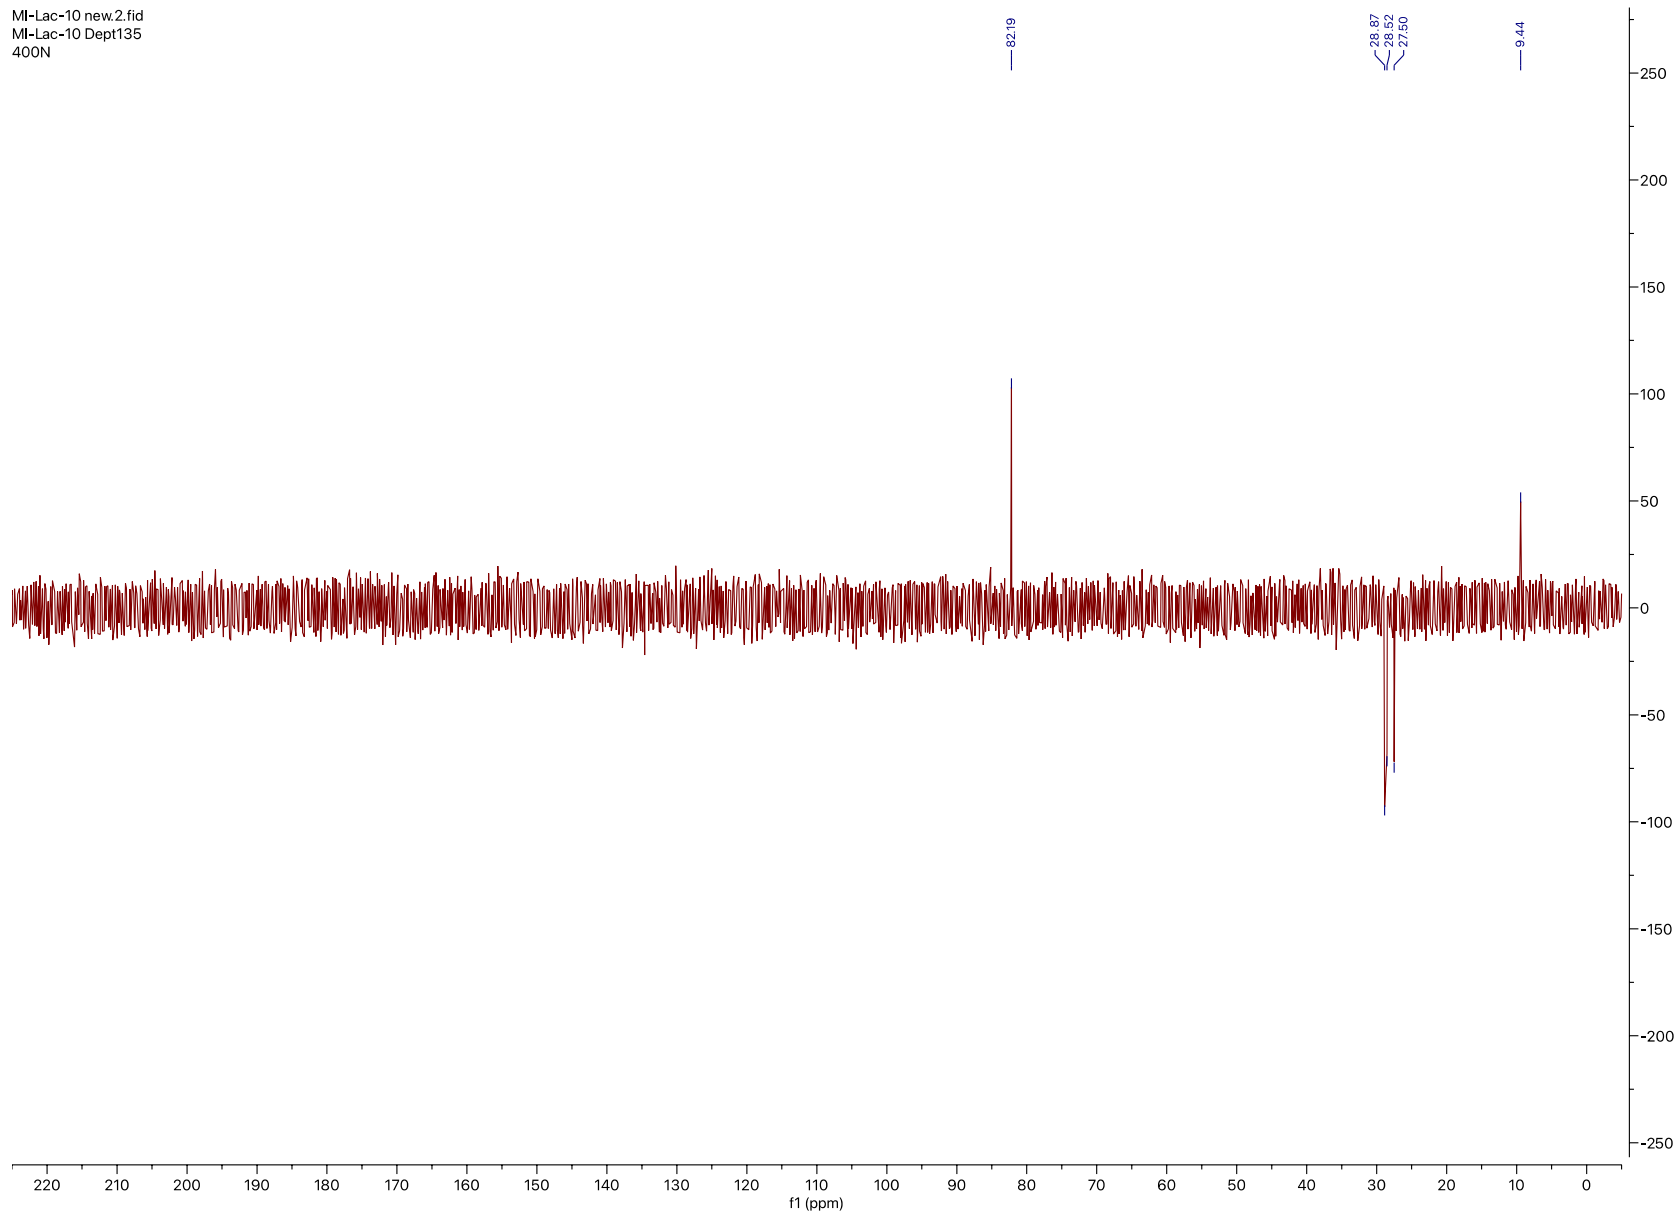

**SI 26:** Dept-135 NMR spectrum of **11** [400 MHz,  $\text{CDCl}_3$ ]
